# Supplementary material for: Synthesis of redox-responsive core–shell nanoparticles: insights into core-crosslinking efficiency
Source: Royal Society of Chemistry journal article supplement (doi:10.1039/d3py00641g), 2023-01-01
Supplement: d3py00641g1.pdf [file d3py00641g1.pdf]

## *Supporting Information:*

# Synthesis of Redox-Responsive Core-Shell Nanoparticles: Insights into Core-Crosslinking Efficiency

Yannik Olszowy, Janick Wesselmann, Shenja Fabienne Over, Florian Pätzold, and Ralf

Weberskirch\*

Faculty of Chemistry and Chemical Biology, Otto-Hahn-Str. 6; TU Dortmund University, D-44227 Dortmund, Germany

To whom correspondence should be addressed:

eMail: [ralf.weberskirch@tu-dortmund.de](mailto:ralf.weberskirch@tu-dortmund.de)

### Table of Contents

|                                                                                                                                                                                                |         |
|------------------------------------------------------------------------------------------------------------------------------------------------------------------------------------------------|---------|
| <b>Table S1.</b> Analytical results of NP1.1-12 determined by SEC and DLS, synthesized from P1.....                                                                                            | p.2     |
| <b>Table S2.</b> Analytical results of NP2.1-10 determined by SEC and DLS, from P2.1-P2.10.....                                                                                                | p.3     |
| <b>Table S3.</b> Results of the SEC recovery experiments for P1 and NP1.1. ....                                                                                                                | p.4     |
| <b>Figure S1.</b> TEM images of NP1.1 in H <sub>2</sub> O (c = 0.01 mg/mL). Stained with uranyl acetate. Mean diameter = 27 ± 3 nm.....                                                        | p.4     |
| <b>Figure S2.</b> SEC elugrams of P2.1-10.....                                                                                                                                                 | p.5     |
| <b>Figure S3.</b> Degradation experiments of NP 2.1-9 to identify the influence of hydrophobic and crosslinkable monomers per polymer chain on the degradation speed monitored <i>via</i> DLS. |         |
| <b>Figure S4 to S9:</b> <sup>1</sup> H and <sup>13</sup> C NMR of RAFT agent T1 and monomer M1.....                                                                                            | p.7-9   |
| <b>Figure S10 to S24:</b> <sup>1</sup> H NMR of PP1/PP2 and P2.1 - P2.12.....                                                                                                                  | p.10-17 |
| <b>Figure S25:</b> SEC elugram of nanoparticle NP1.13 and degradation with DTT.....                                                                                                            | p.18    |
| <b>Figure S24 to Figure S31:</b> DLS data of the NP1.X series in MeOH, five measurements.....                                                                                                  | p.18-21 |
| <b>Figure S32:</b> SEC elugram from macroRAFT PP3 and block copolymers P2.11/P2.12.....                                                                                                        | p.21    |
| <b>Figure S33 S34:</b> SEC data of NP3.1 to NP3.8 and NP4.1 to NP4.8.....                                                                                                                      | p.22/23 |

**Table S1.** Analytical results of the nanoparticles NP1.1-12 determined by SEC and DLS, synthesized from P1.

<sup>a)</sup> determined by DLS measurements ( $c = 1 \text{ mg/mL}$ ); <sup>b)</sup> determined by SEC, measured in DMF + 5 g/L LiBr (PMMA standard) ( $c = 3 \text{ mg/mL}$ ). <sup>c)</sup> determined by SEC with non-crosslinked polymer as

| NP     | eq. cystamine | T [°C] | t [h] | $d_h^a$ (H <sub>2</sub> O) [nm] (PDI) | $d_h^a$ (MeOH) [nm] (PDI)     | $M_n^b$ [g/mol] | $\bar{D}^b$ | cross. <sup>b)</sup> [%] | cross. <sup>c)</sup> [%] |
|--------|---------------|--------|-------|---------------------------------------|-------------------------------|-----------------|-------------|--------------------------|--------------------------|
| NP1.1  | 0.5           | 40     | 20    | 18 ± 1<br>(0.186 ± 0.021)             | 23 ± 3<br>(0.091 ± 0.019)     | 250 500         | 1.44        | 83                       | 78                       |
| NP1.2  | 0.5 (HDA)     | 40     | 20    | 17 ± 2<br>(0.156 ± 0.017)             | 20 ± 2<br>(0.226 ± 0.011)     | 215 800         | 1.65        | 79                       | 77                       |
| NP1.3  | 0.5           | 22     | 20    | 17 ± 2<br>(0.249 ± 0.014)             | 27 ± 2<br>(0.198 ± 0.008)     | 329 100         | 2.04        | 82                       | 78                       |
| NP1.4  | 0.5           | 60     | 20    | 129 ± 20*<br>(0.279 ± 0.020)          | 613 ± 101*<br>(0.168 ± 0.031) | 1 117 000       | 2.45        | 82                       | 79                       |
| NP1.5  | 0.5           | 80     | 20    | 114 ± 22*<br>(0.291 ± 0.016)          | 311 ± 31*<br>(0.134 ± 0.070)  | ---             | ---         | 0                        | 79                       |
| NP1.6  | 0.125         | 40     | 20    | 19 ± 1<br>(0.182 ± 0.026)             | 290 ± 249<br>(0.407 ± 0.202)  | ---             | ---         | 20                       | 21                       |
| NP1.7  | 0.25          | 40     | 20    | 35 ± 5<br>(0.280 ± 0.034)             | 17 ± 3<br>(0.152 ± 0.029)     | 125 000         | 1.85        | 61                       | 59                       |
| NP1.8  | 1             | 40     | 20    | 19 ± 3<br>(0.182 ± 0.026)             | 19 ± 4<br>(0.240 ± 0.026)     | 250 300         | 1.91        | 85                       | 81                       |
| NP1.9  | 2             | 40     | 20    | 26 ± 8*<br>(0.280 ± 0.069)            | 22 ± 4*<br>(0.258 ± 0.040)    | 278 500         | 2.40        | 56                       | 84                       |
| NP1.10 | 5             | 40     | 20    | 17 ± 3*<br>(0.338 ± 0.086)            | 171 ± 83*<br>(0.305 ± 0.093)  | 1 430 700       | 1.87        | 6                        | 66                       |
| NP1.11 | 0.5           | 40     | 48    | 20 ± 2<br>(0.193 ± 0.010)             | 18 ± 3<br>(0.171 ± 0.010)     | 223 100         | 1.58        | 84                       | 79                       |
| NP1.12 | 0.5           | 40     | 72    | 21 ± 3<br>(0.168 ± 0.026)             | 23 ± 1<br>(0.158 ± 0.032)     | 217 600         | 1.54        | 83                       | 79                       |

reference; \*poorly soluble

**Table S2.** Analytical results of the nanoparticles **NP2.1-NP2.10** determined by SEC and DLS, synthesized from **P2.1-10**.

| NP     | polymer | DP x/y/z<br>(theo.)    | $d_h^a$ (H <sub>2</sub> O)<br>[nm] (PDI) | $d_h^a$ (MeOH)<br>[nm] (PDI) | $M_n^b$<br>[g/mol] | $\bar{D}^b$ | cross. <sup>b)</sup><br>[%] | cross. <sup>c)</sup><br>[%] |
|--------|---------|------------------------|------------------------------------------|------------------------------|--------------------|-------------|-----------------------------|-----------------------------|
| NP2.1  | P2.1    | 51/0/5<br>(51/0/5)     | 13 ± 3<br>(0.307 ± 0.070)                | 13 ± 2<br>(0.231 ± 0.057)    | 115 500            | 1.42        | 37                          | 49                          |
| NP2.2  | P2.2    | 51/0/10<br>(51/0/10)   | 14 ± 3<br>(0.298 ± 0.035)                | 14 ± 2<br>(0.274 ± 0.071)    | 174 600            | 2.00        | 76                          | 78                          |
| NP2.3  | P2.3    | 51/0/14<br>(51/0/15)   | 20 ± 3<br>(0.207 ± 0.010)                | 30 ± 4<br>(0.228 ± 0.009)    | 287 700            | 2.14        | 85                          | 84                          |
| NP2.4  | P2.4    | 51/0/20<br>(51/0/20)   | 40 ± 5*<br>(0.284 ± 0.063)               | 128 ± 23*<br>(0.321 ± 0.009) | 387 600            | 2.42        | 85                          | 86                          |
| NP2.5  | P2.5    | 51/5/5<br>(51/5/5)     | 21 ± 2<br>(0.197 ± 0.019)                | 17 ± 2<br>(0.191 ± 0.025)    | 150 800            | 1.30        | 67                          | 65                          |
| NP2.6  | P2.6    | 51/5/10<br>(51/5/10)   | 22 ± 1<br>(0.216 ± 0.018)                | 22 ± 1<br>(0.180 ± 0.016)    | 183 200            | 1.45        | 81                          | 80                          |
| NP2.7  | P2.7    | 51/6/15<br>(51/5/15)   | 48 ± 15*<br>(0.297 ± 0.039)              | 69 ± 14*<br>(0.323 ± 0.028)  | 428 300            | 3.04        | 83                          | 83                          |
| NP2.8  | P2.8    | 51/9/5<br>(51/10/5)    | 22 ± 3<br>(0.207 ± 0.042)                | 16 ± 2<br>(0.311 ± 0.022)    | 129 800            | 1.52        | 52                          | 62                          |
| NP2.9  | P2.9    | 51/11/10<br>(51/10/10) | 25 ± 2<br>(0.212 ± 0.009)                | 25 ± 2<br>(0.181 ± 0.005)    | 306 400            | 2.05        | 83                          | 82                          |
| NP2.10 | P2.10   | 51/10/14<br>(51/10/15) | 68 ± 19*<br>(0.327 ± 0.044)              | 637 ± 94*<br>(0.115 ± 0.064) | 392 200            | 2.69        | 86                          | 88                          |

a) determined by DLS measurements ( $c = 1$  mg/mL); b) determined by SEC, measured in DMF + 5 g/L LiBr (PMMA standard) ( $c = 3$  mg/mL); c) determined by SEC with non-crosslinked polymer as reference; \*: poorly soluble.

**Table S3.** Results of the SEC recovery experiments for **P1** and **NP1.1**.

| polymer/NP | recovery <sup>a)</sup> [%] | S.D. <sup>a)</sup> [%] |
|------------|----------------------------|------------------------|
| P1         | 90                         | 3                      |
| NP1.1      | 92                         | 4                      |

a) determined by SEC, measured in DMF + 5 g/L LiBr (PMMA standard) ( $c = 3$  mg/mL)  $n = 3$ .

**Table S4.** Hydrodynamic diameters ( $d_h$ ) and polydispersity indices (PDI) of the nanoparticles NP3.1-NP3.8 synthesized from the precursor polymer **P2.11** with the different amine crosslinkers (**V1-V6**). Determined by DLS measurements in water and methanol ( $\beta = 1$  mg/mL, at 25 °C).

| crosslinker                               | nanoparticle                | $d_h$ (H <sub>2</sub> O)<br>(nm) | PDI         | $d_h$ (MeOH)<br>(nm) | PDI         |
|-------------------------------------------|-----------------------------|----------------------------------|-------------|----------------------|-------------|
| 1,4-diamino butane ( <b>V1</b> )          | <b>NP3.1</b>                | 16 ± 1                           | 0.19 ± 0.02 | 22 ± 1               | 0.23 ± 0.02 |
| 1,6-diamino hexane ( <b>V2</b> )          | <b>NP3.2</b>                | 12 ± 3                           | 0.25 ± 0.06 | 14 ± 2               | 0.23 ± 0.05 |
| cystamine ( <b>V3</b> )                   | <b>NP3.3</b>                | 19 ± 1                           | 0.15 ± 0.03 | 19 ± 1               | 0.15 ± 0.03 |
| 1,8-diamino oktane ( <b>V4</b> )          | <b>NP3.4</b>                | 16 ± 2                           | 0.20 ± 0.02 | 23 ± 2               | 0.22 ± 0.02 |
| 4,4'-diamino diphenylmethan ( <b>V5</b> ) | <b>NP3.5</b>                | 18 ± 1                           | 0.15 ± 0.03 | 1 ± 1                | 0.59 ± 0.20 |
|                                           | <b>NP3.6</b> <sup>[a]</sup> | 19 ± 2                           | 0.22 ± 0.02 | 2 ± 2                | 0.27 ± 0.05 |
| tris(2-aminoethyl)amine ( <b>V6</b> )     | <b>NP3.7</b> <sup>[b]</sup> | 15 ± 2                           | 0.16 ± 0.02 | 19 ± 2               | 0.14 ± 0.03 |
|                                           | <b>NP3.8</b>                | 18 ± 3                           | 0.16 ± 0.05 | 16 ± 4               | 0.20 ± 0.01 |

<sup>a</sup> Use of 1.00 eq. or 0.99 eq. of the crosslinker 4,4'-diamino-diphenylmethane (**V5**). <sup>b</sup> Use of 0.33 eq. of the crosslinker tris(2-aminoethyl)amine (**V6**). 0.5 eq. of each of the other cross-linkers were used.

**Table S5.** Hydrodynamic diameters ( $d_h$ ) and polydispersity indices (PDI) of the nanoparticles NP7.1-NP12.4 synthesized from the precursor polymer **P2.12** with the different amine crosslinkers (**V1-V6**). Determined by DLS measurements in water and methanol ( $\beta = 1$  mg/mL, at 25 °C).

| crosslinker                               | nanoparticle                | $d_h$ (H <sub>2</sub> O)<br>(nm) | PDI         | $d_h$ (MeOH)<br>(nm) | PDI         |
|-------------------------------------------|-----------------------------|----------------------------------|-------------|----------------------|-------------|
| 1,4-diamino butane ( <b>V1</b> )          | <b>NP4.1</b>                | 21 ± 2                           | 0.17 ± 0.03 | 24 ± 2               | 0.16 ± 0.03 |
| 1,6-diamino hexane ( <b>V2</b> )          | <b>NP4.2</b>                | 16 ± 2                           | 0.23 ± 0.03 | 23 ± 1               | 0.16 ± 0.02 |
| cystamine ( <b>V3</b> )                   | <b>NP4.3</b>                | 20 ± 2                           | 0.19 ± 0.02 | 22 ± 4               | 0.14 ± 0.02 |
| 1,8-diamino oktane ( <b>V4</b> )          | <b>NP4.4</b>                | 18 ± 2                           | 0.18 ± 0.02 | 23 ± 3               | 0.21 ± 0.02 |
| 4,4'-diamino diphenylmethan ( <b>V5</b> ) | <b>NP4.5</b>                | 20 ± 1                           | 0.15 ± 0.04 | 2 ± 2                | 0.52 ± 0.13 |
|                                           | <b>NP4.6</b> <sup>[a]</sup> | 21 ± 1                           | 0.20 ± 0.03 | 1.0 ± 0.3            | 0.51 ± 0.21 |
| tris(2-aminoethyl)amine ( <b>V6</b> )     | <b>NP4.7</b> <sup>[b]</sup> | 21 ± 2                           | 0.16 ± 0.03 | 22 ± 3               | 0.15 ± 0.03 |
|                                           | <b>NP4.8</b>                | 21 ± 1                           | 0.17 ± 0.02 | 21 ± 3               | 0.19 ± 0.02 |

The crosslinker **V5** was partially dissolved in [a] toluene (NP4.6, before addition to the polymer solution. [b] Use of 0.33 eq. of the crosslinker tris(2-aminoethyl)amine (**V6**). 0.5 eq. of each of the other cross-linkers were used.

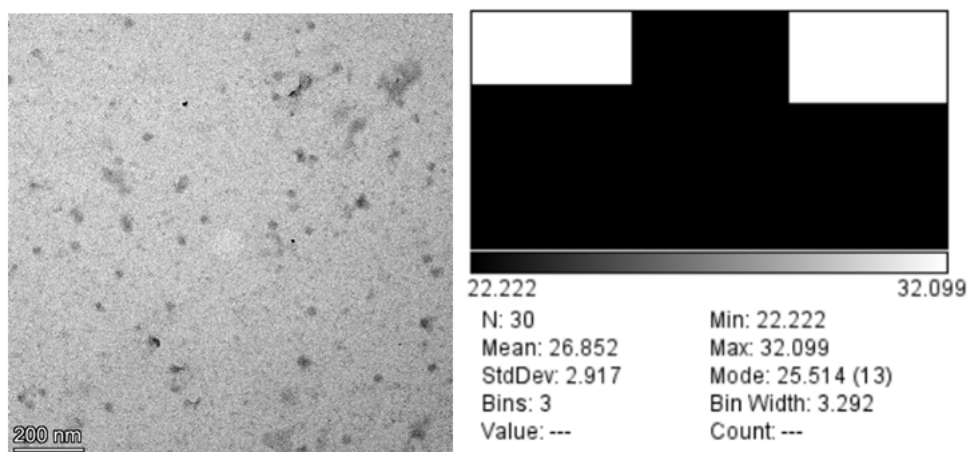

**Figure S1.** TEM images of NP1.1 in H<sub>2</sub>O (c = 0.01 mg/mL). Stained with uranyl acetate. Mean diameter =  $27 \pm 3$  nm.

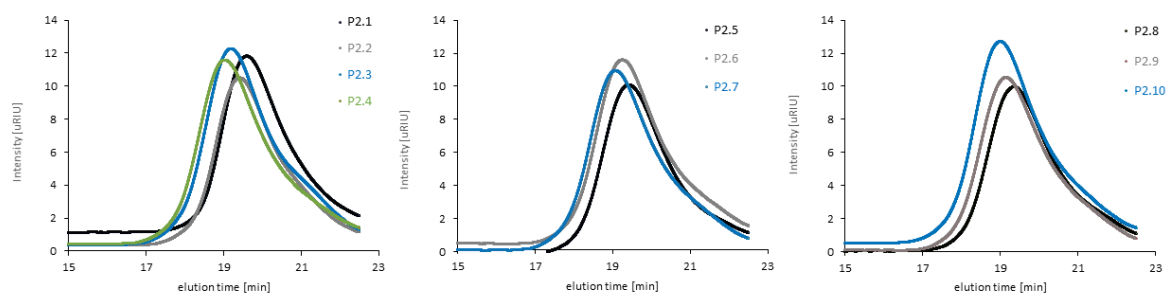

**Figure S2.** SEC elugrams of P2.1 - P2.10.

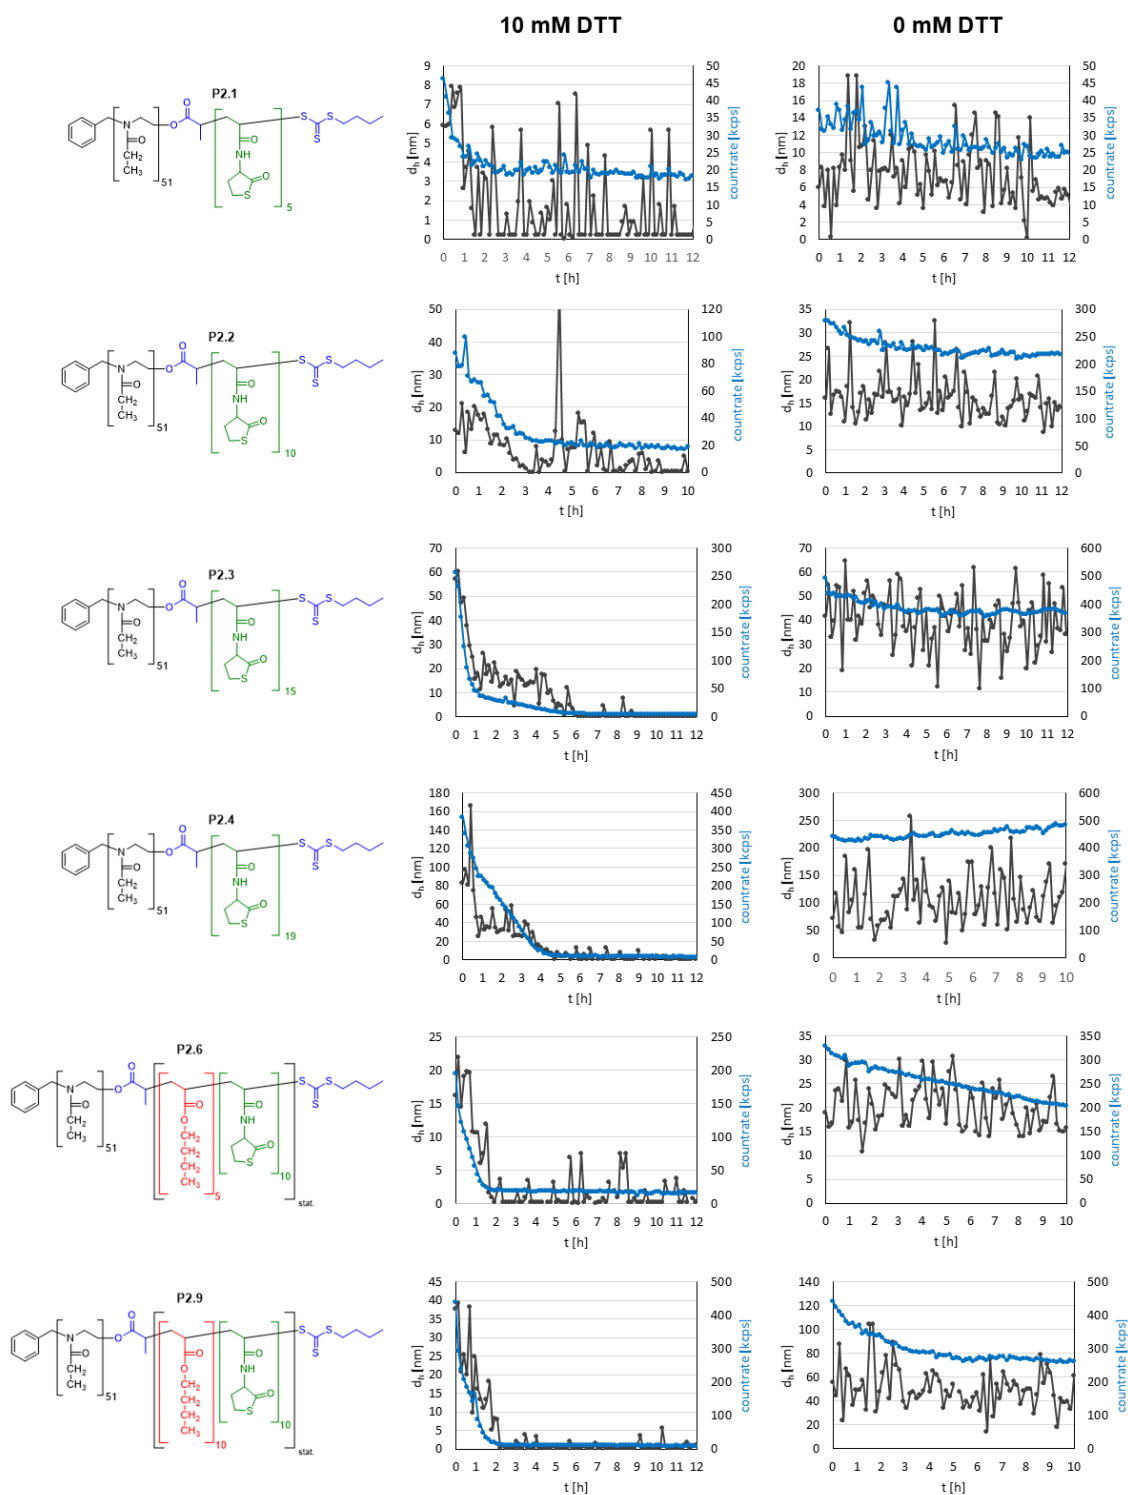

**Figure S3.** Degradation experiments of NP2.1 – NP2.9 to analyze the influence of hydrophobic and crosslinkable monomers per polymer chain on the degradation speed monitored *via* DLS. The samples were dissolved in MeOH with 1 %v/v TEA and degassed with Argon for 30 min. Afterwards DTT was added to the solution and the measurement was started. The hydrodynamic diameter is shown in black and the countrate in blue.

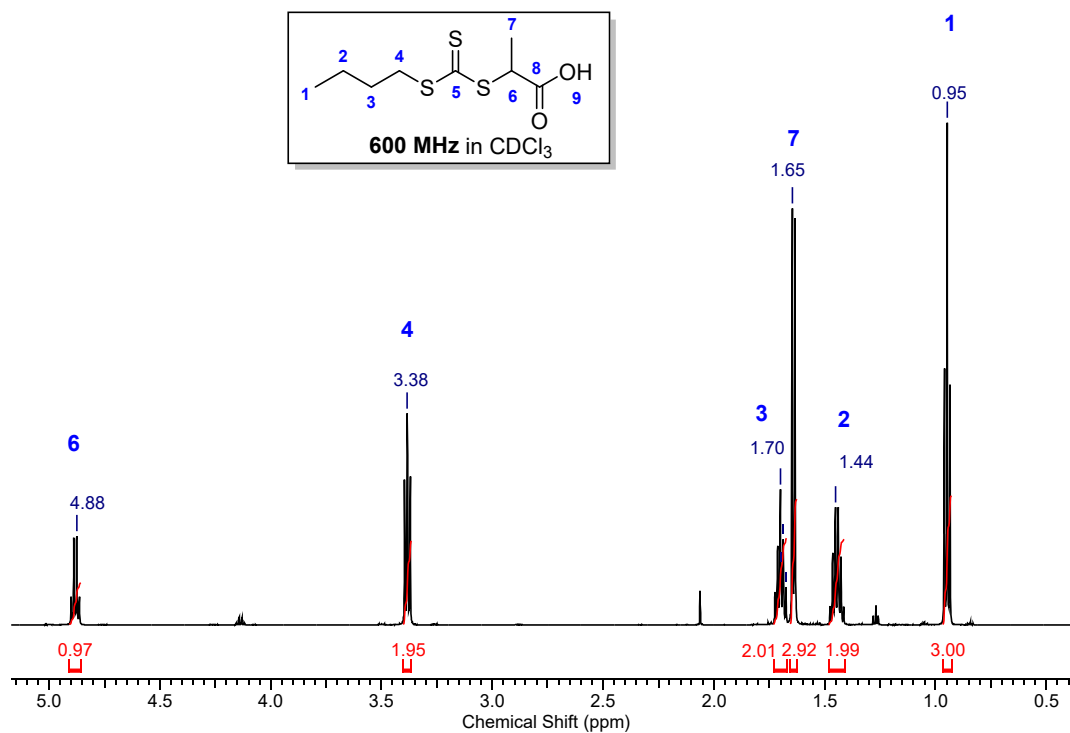

Figure S4: <sup>1</sup>H-NMR of T1 in CDCl<sub>3</sub>.

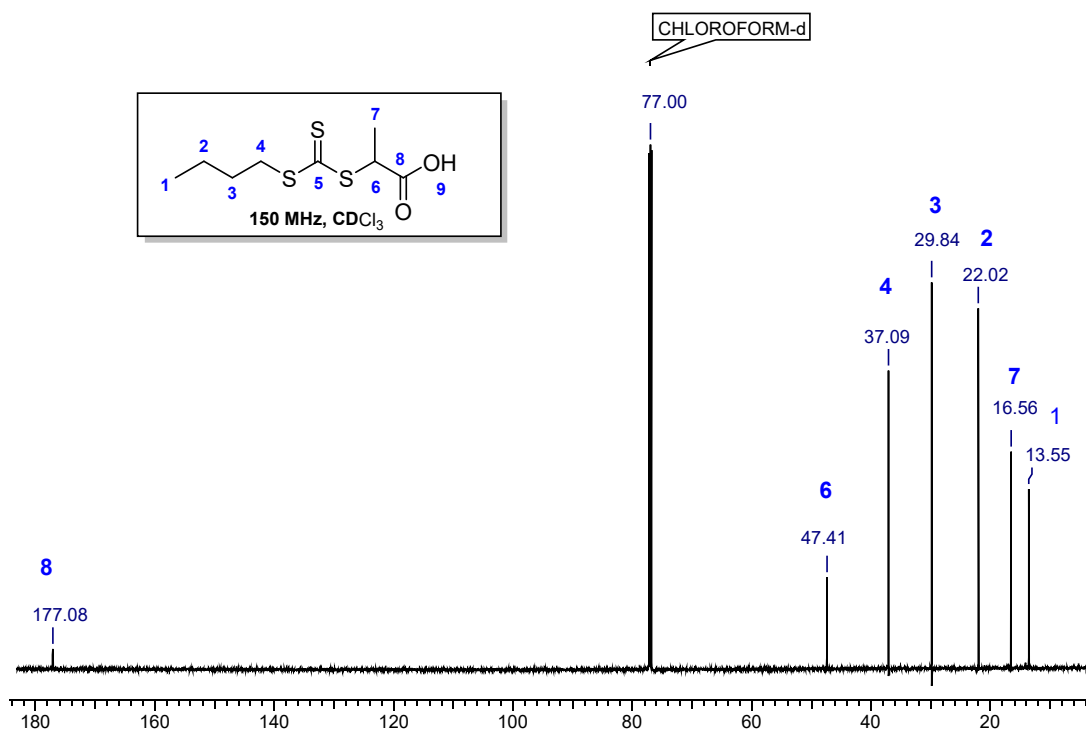

Figure S5: <sup>13</sup>C-NMR of T1 in CDCl<sub>3</sub>.

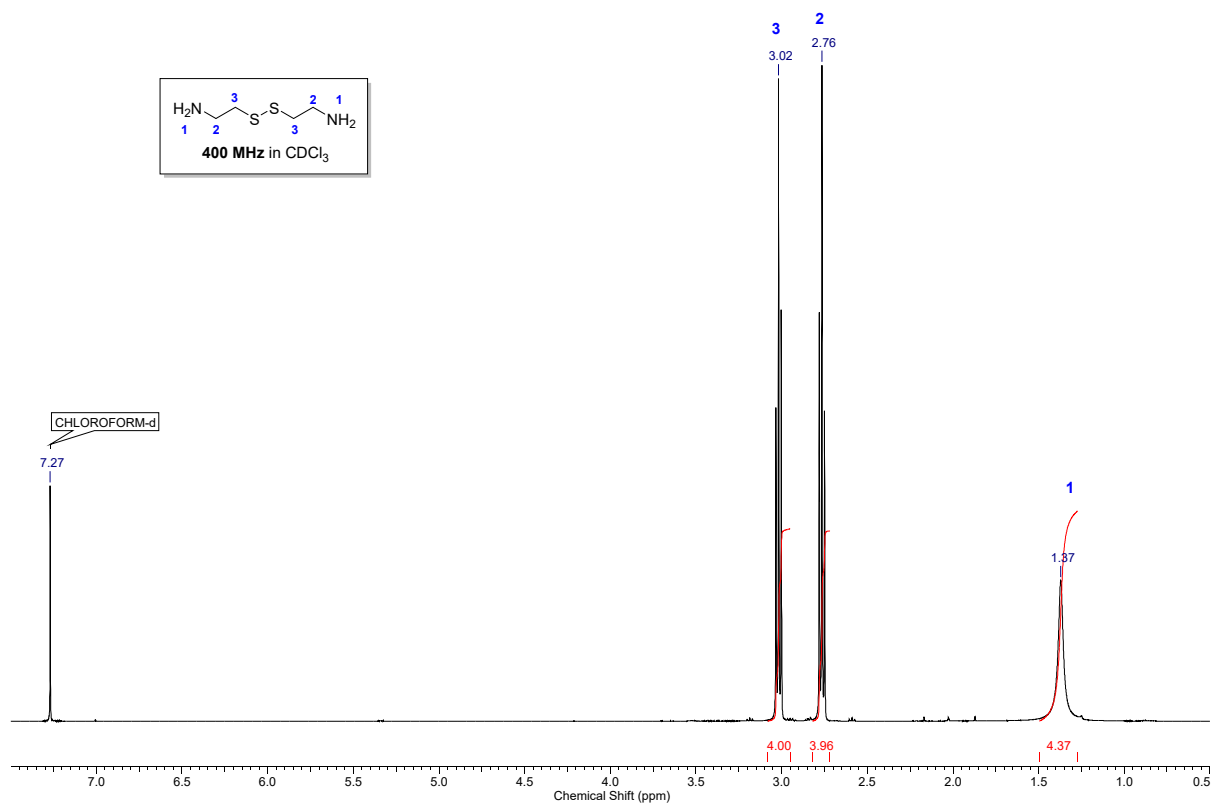

**Figure S6:** <sup>1</sup>H-NMR of cystamine in CDCl<sub>3</sub>.

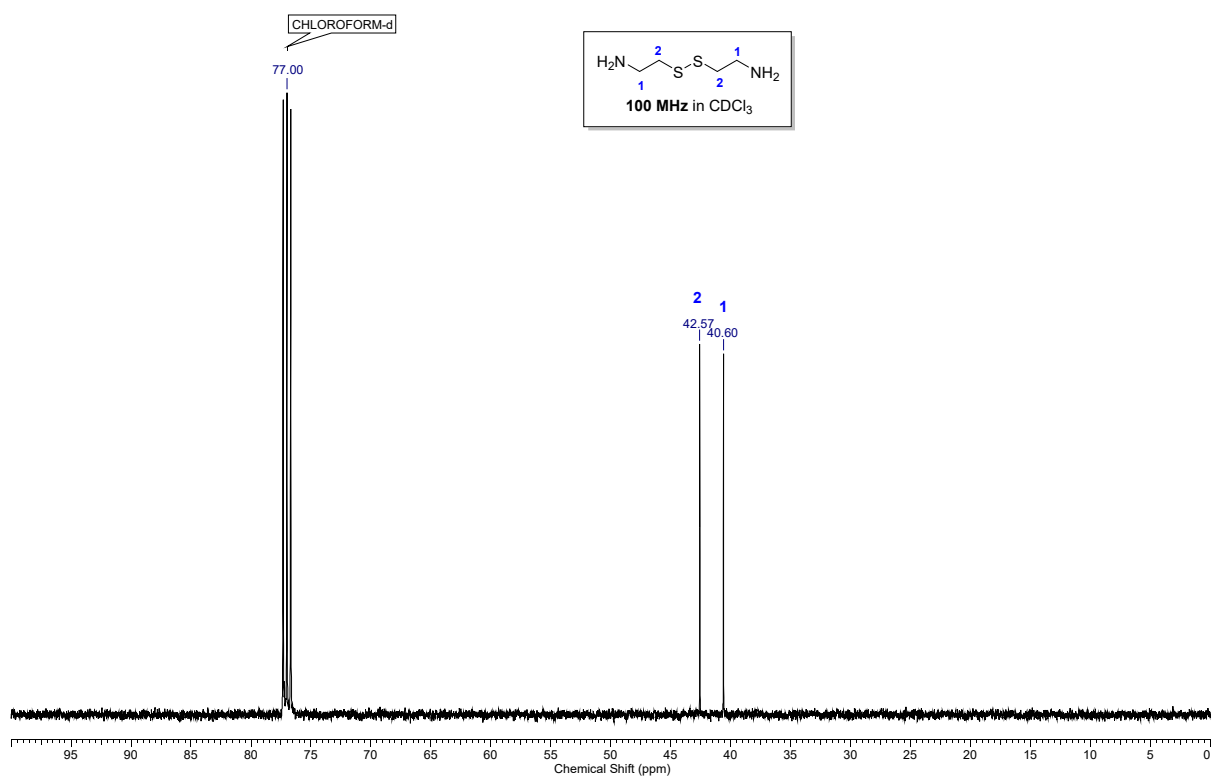

**Figure S7:** <sup>13</sup>C-NMR of cystamine in CDCl<sub>3</sub>.



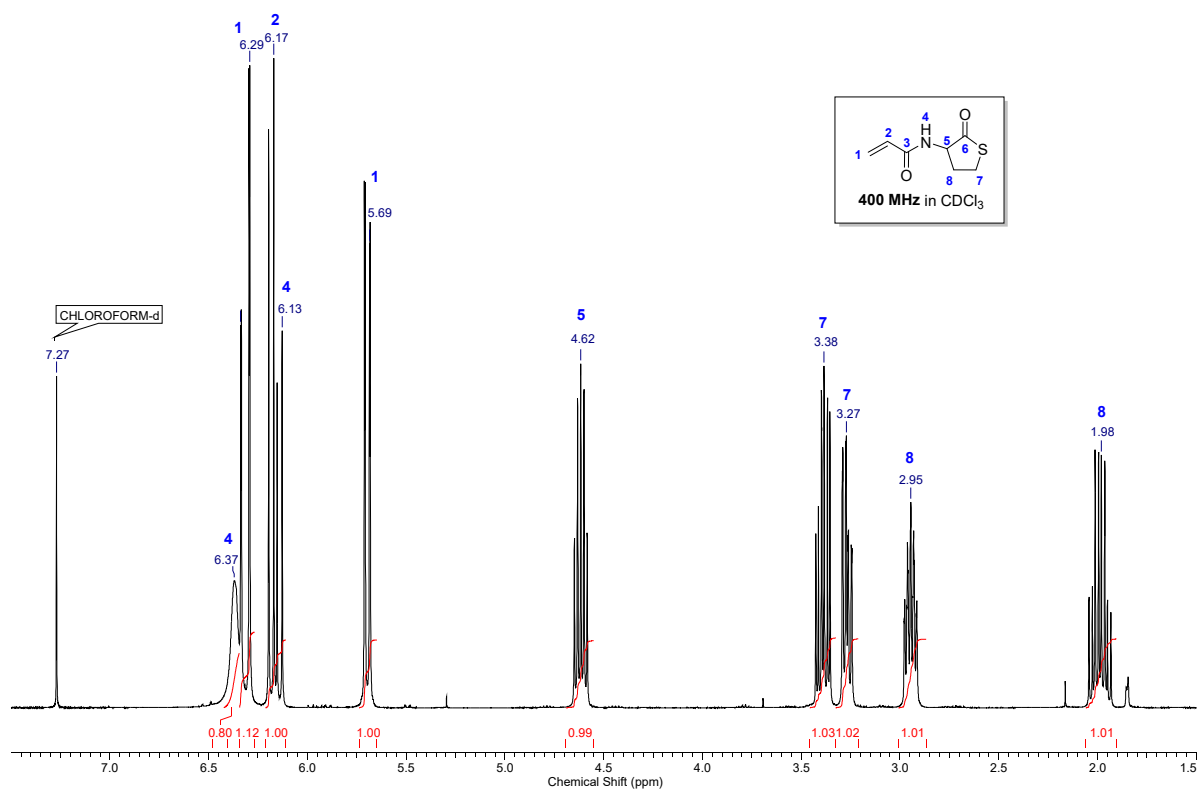

Figure S8: <sup>1</sup>H-NMR of M1 in CDCl<sub>3</sub>.

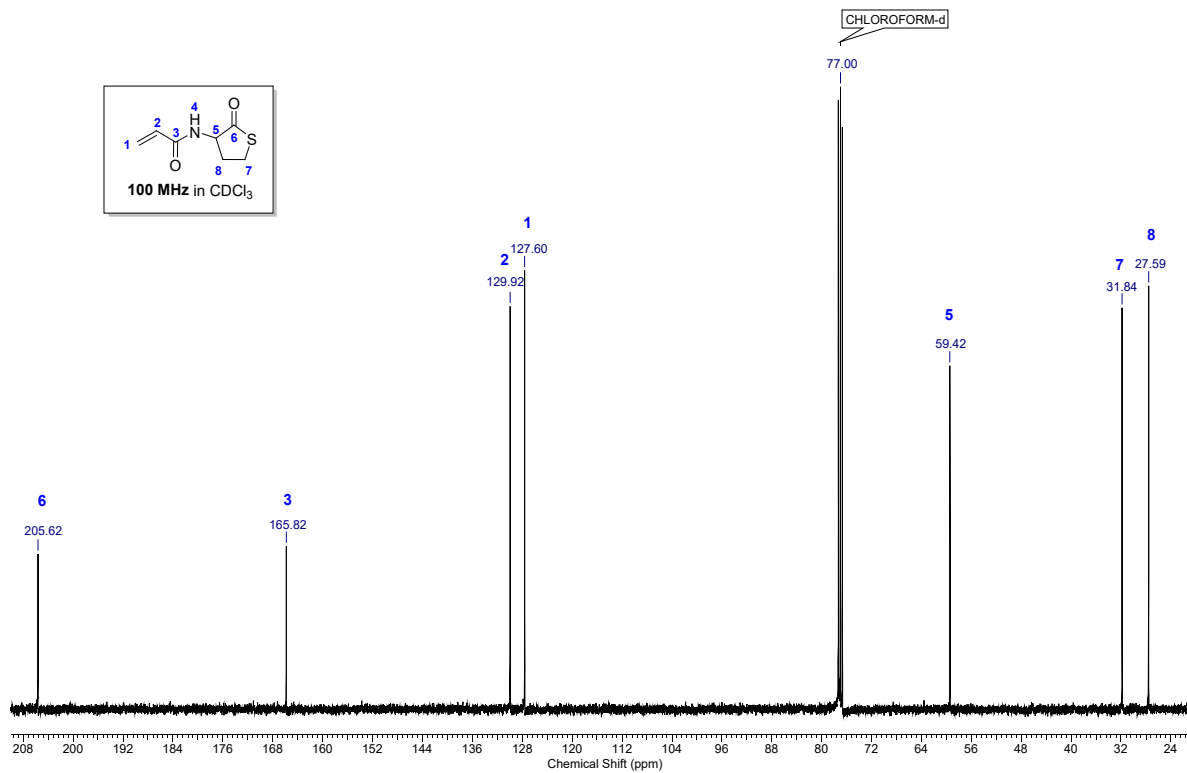

Figure S9: <sup>13</sup>C-NMR of M1 in CDCl<sub>3</sub>.

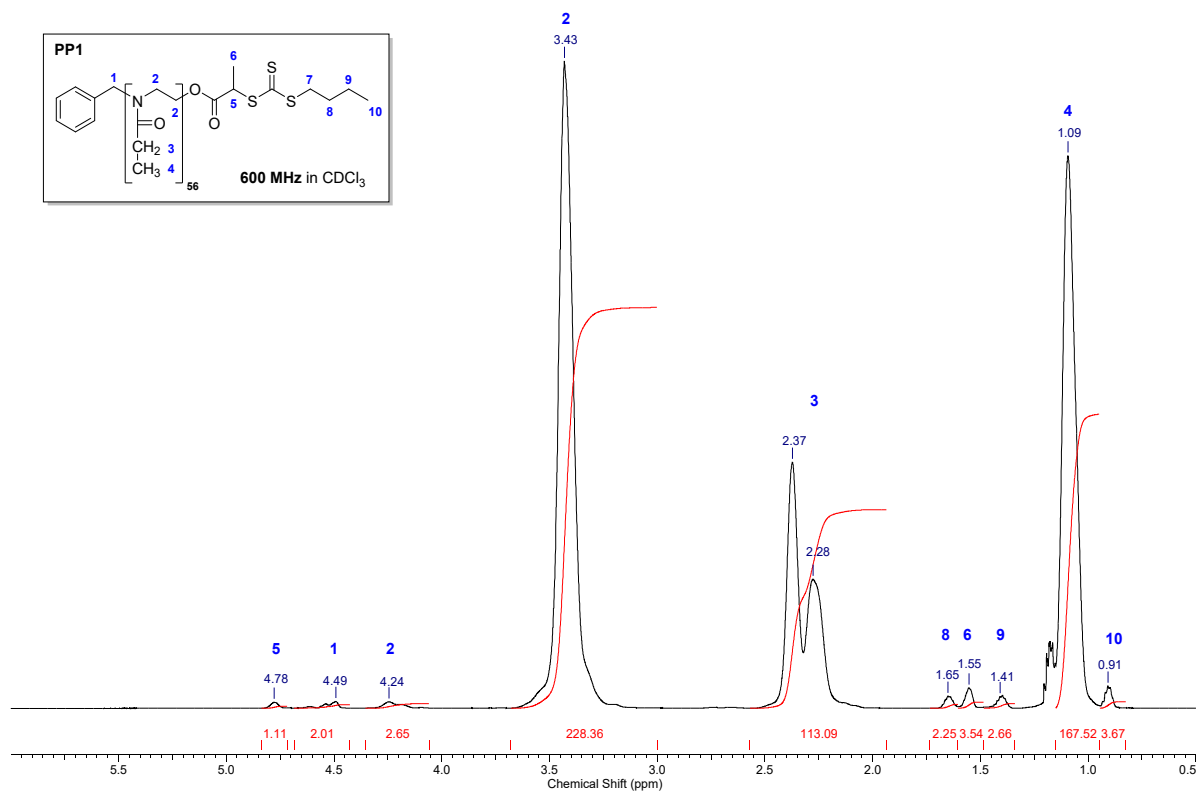

Figure S10: <sup>1</sup>H-NMR of PP1 in CDCl<sub>3</sub>.

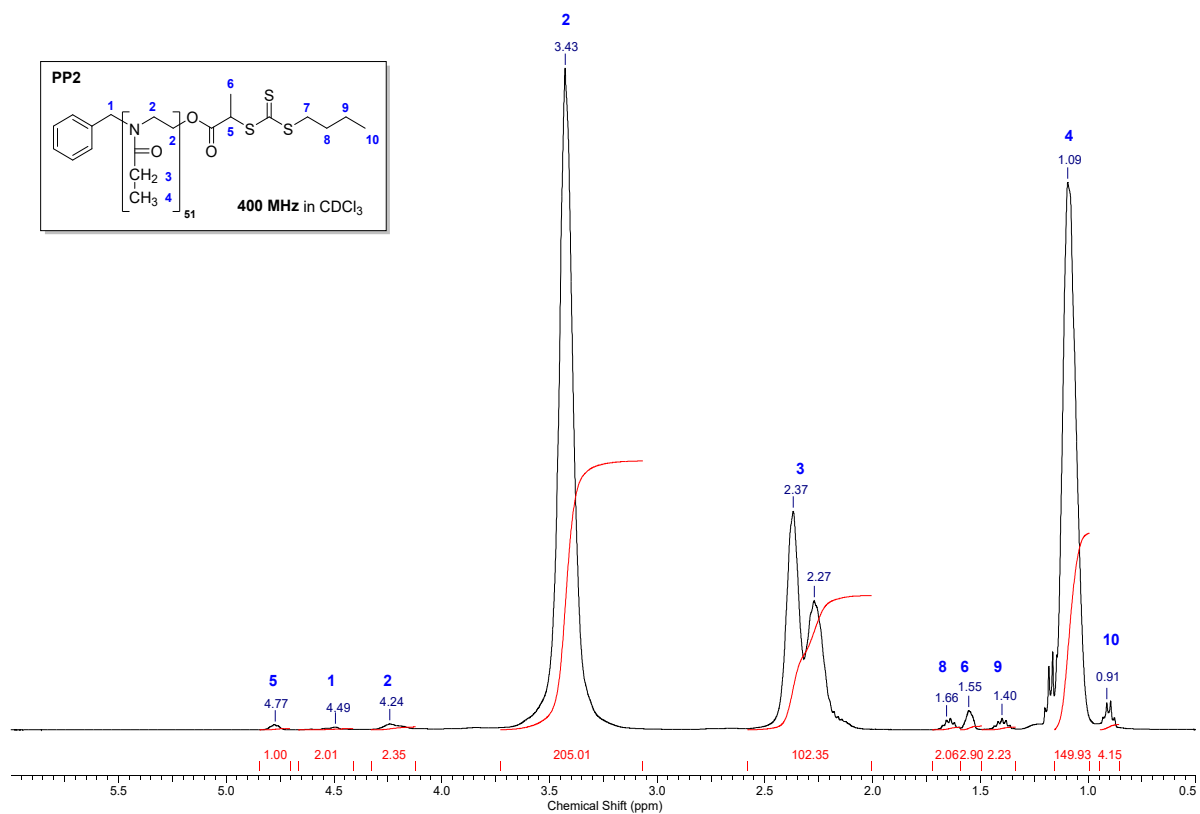

Figure S11: <sup>1</sup>H-NMR of PP2 in CDCl<sub>3</sub>.

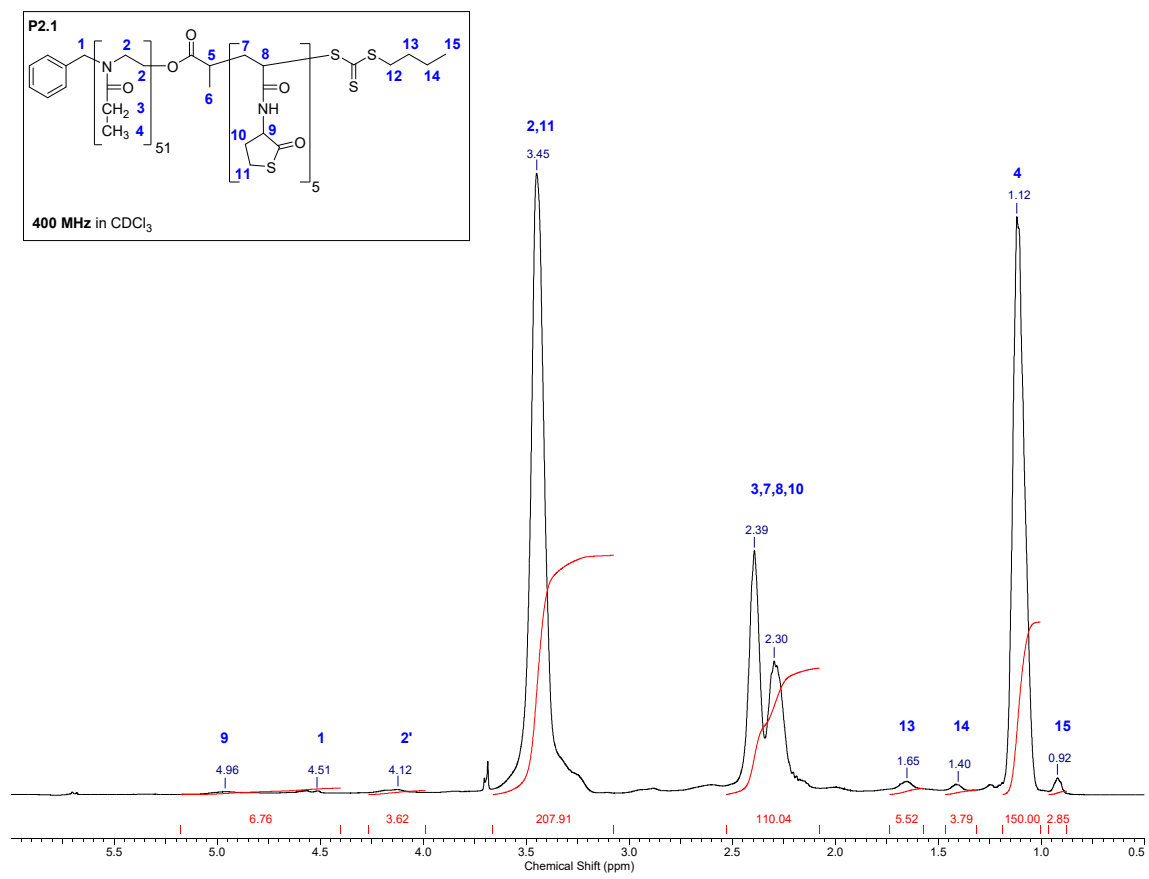

**Figure S12:** <sup>1</sup>H-NMR of P2.1 in CDCl<sub>3</sub>.

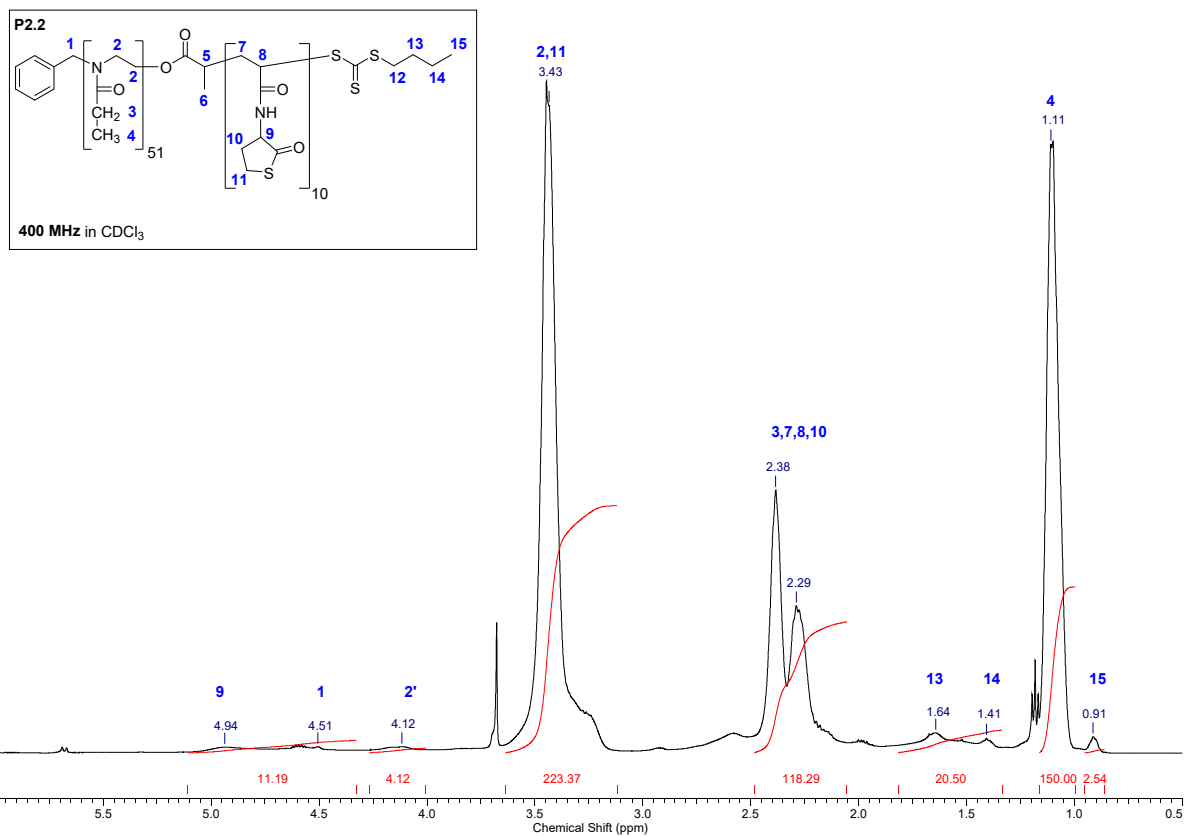

Figure S13: <sup>1</sup>H-NMR of P2.2 in CDCl<sub>3</sub>.

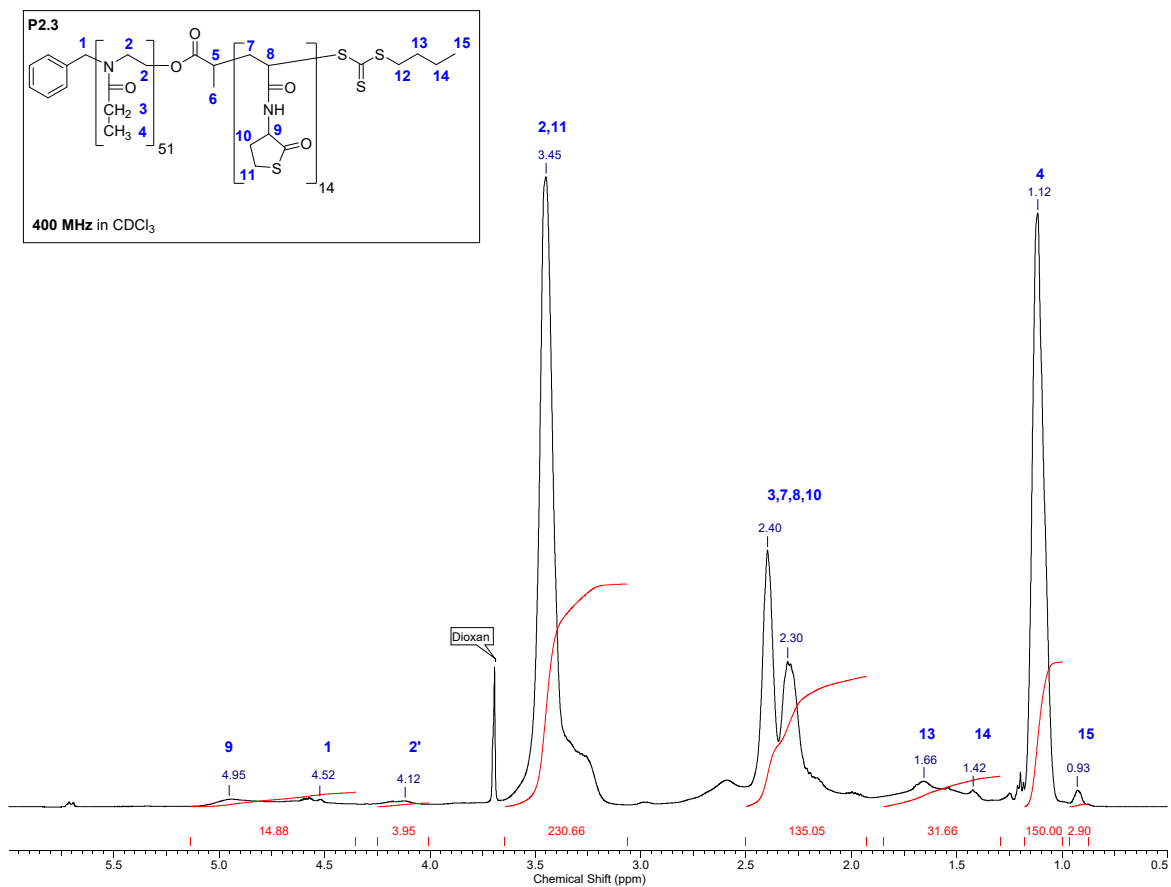

Figure S14: <sup>1</sup>H-NMR of P2.3 in CDCl<sub>3</sub>.

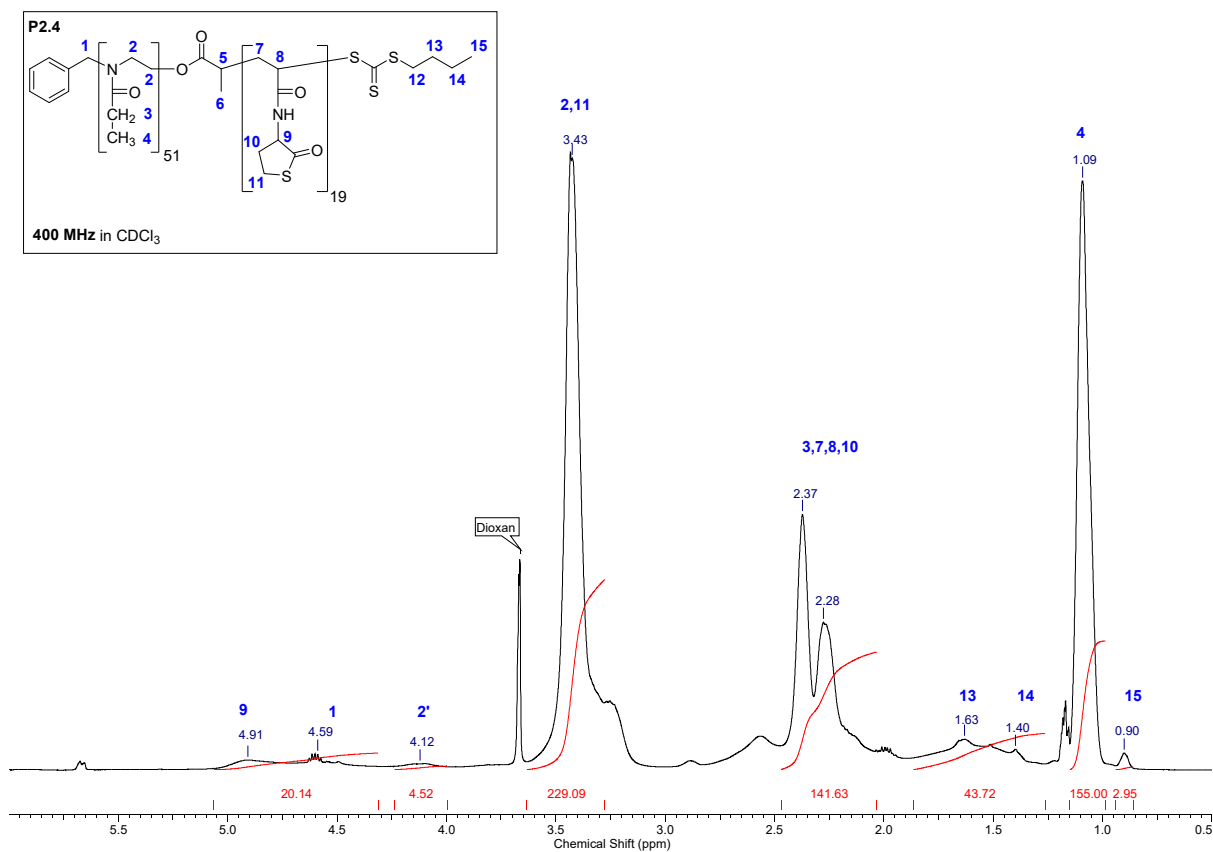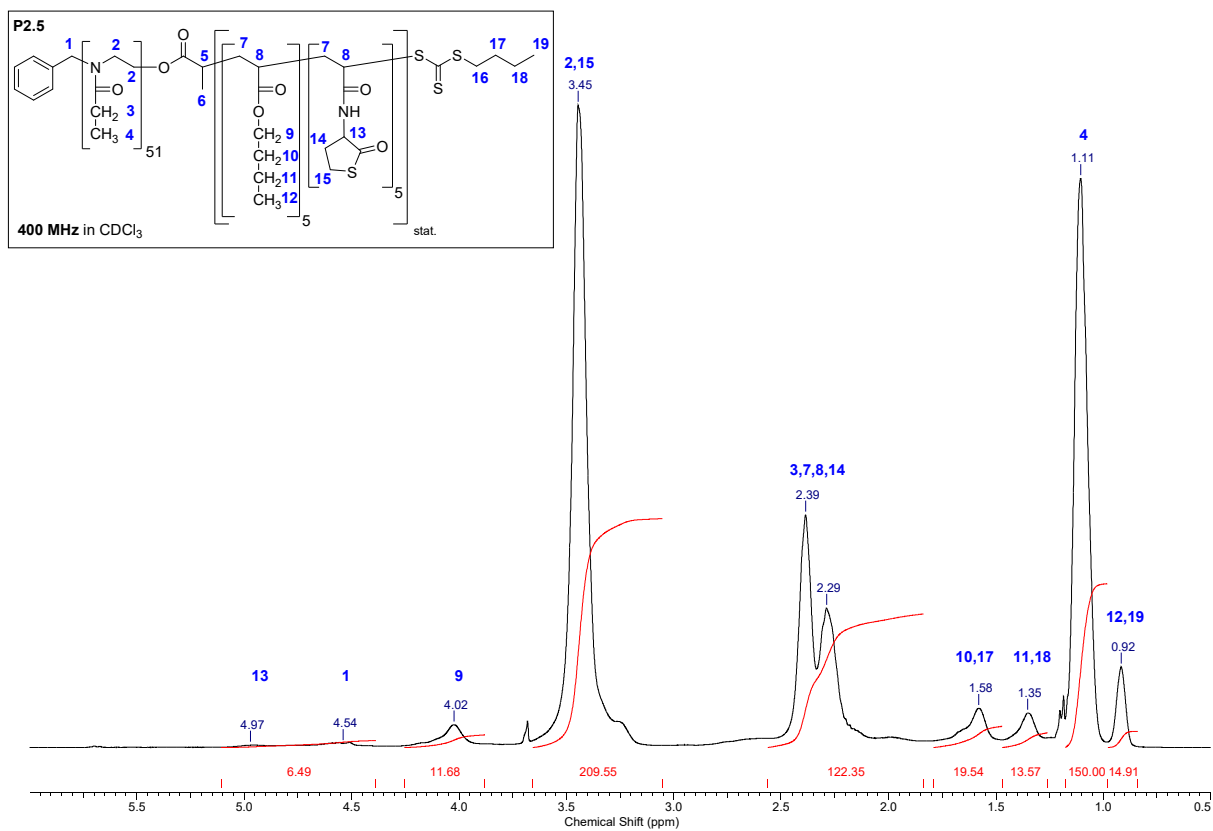

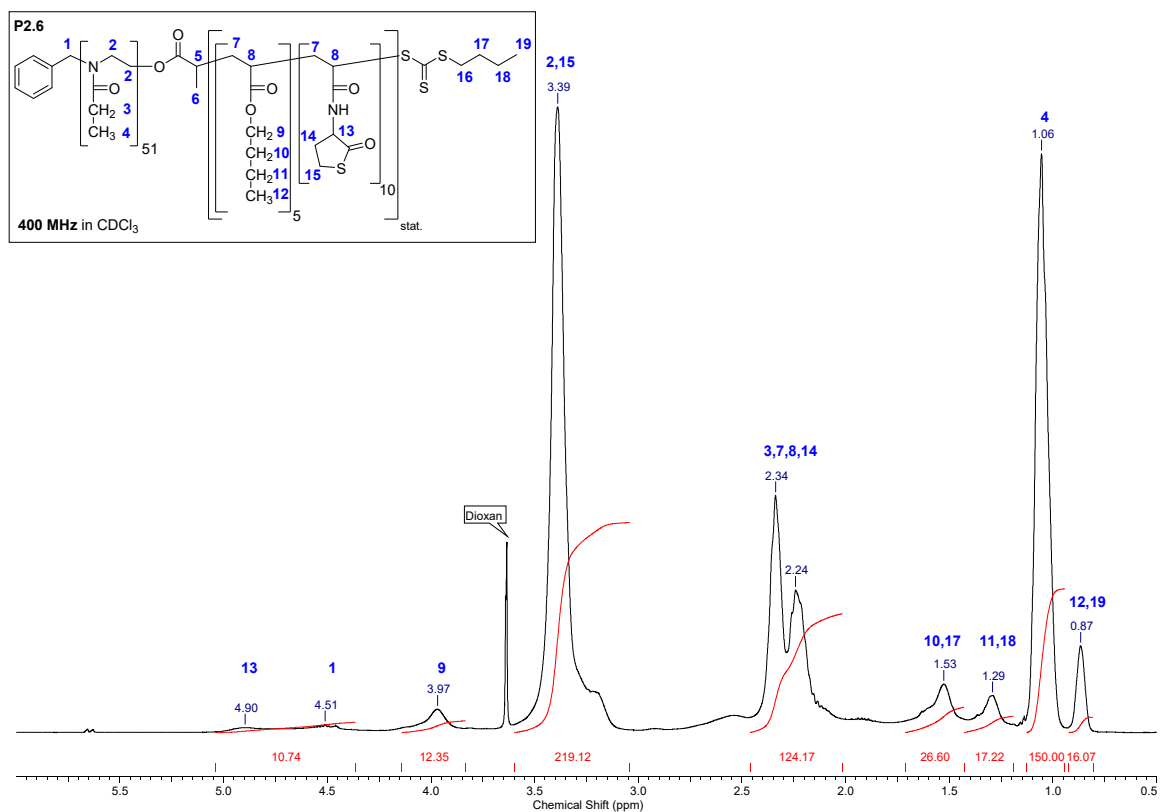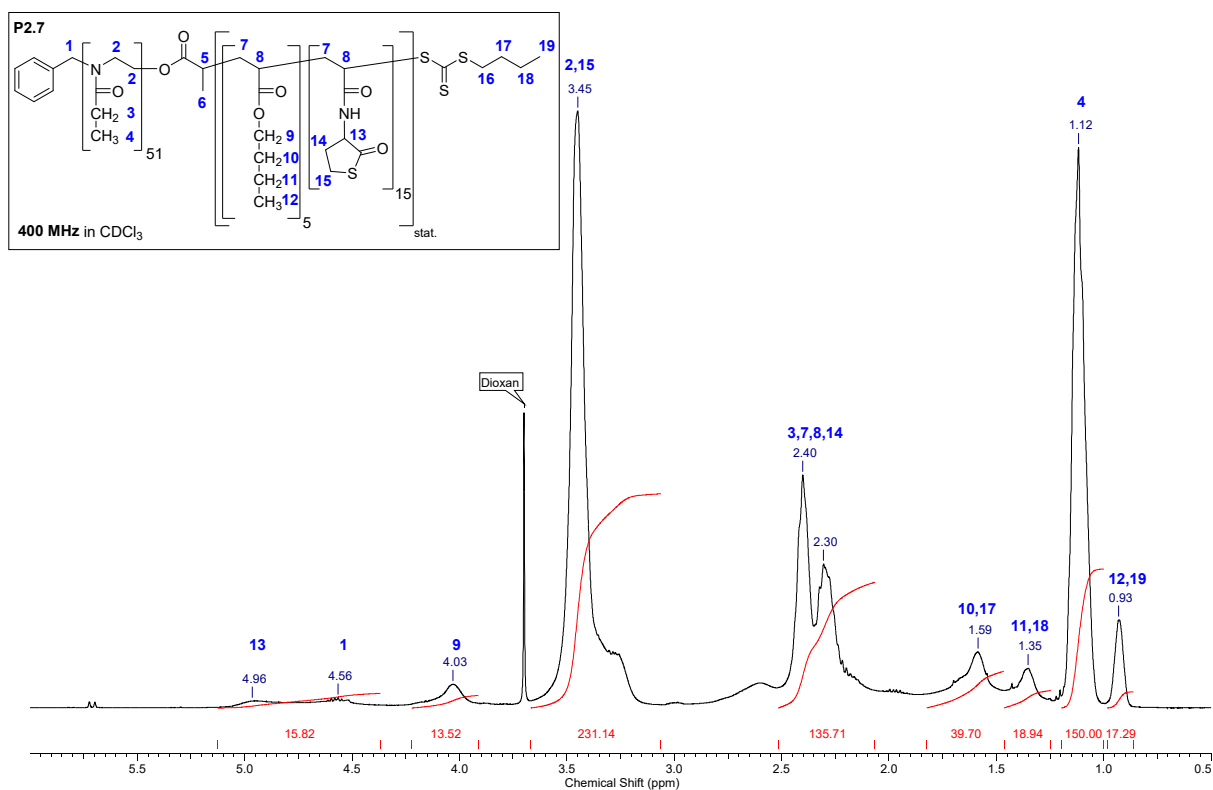

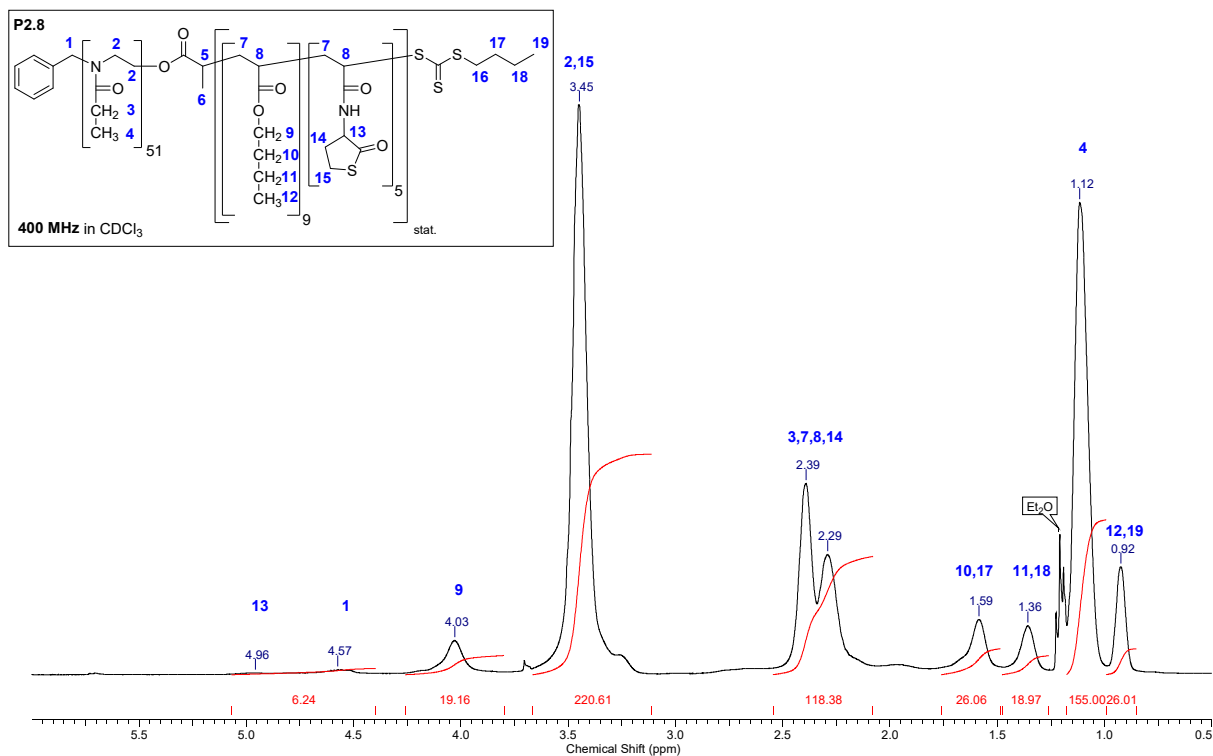

**Figure S19:** <sup>1</sup>H-NMR of P2.8 in CDCl<sub>3</sub>.

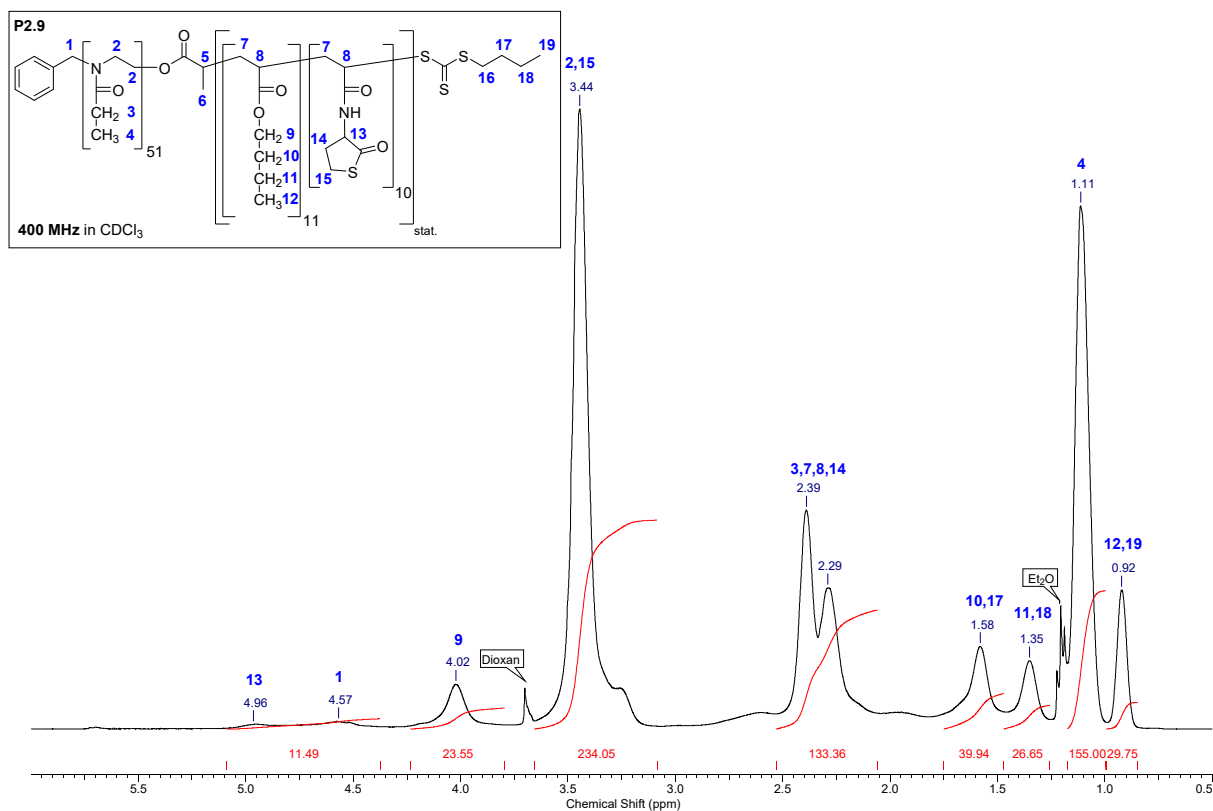

**Figure S20:** <sup>1</sup>H-NMR of P2.9 in CDCl<sub>3</sub>.

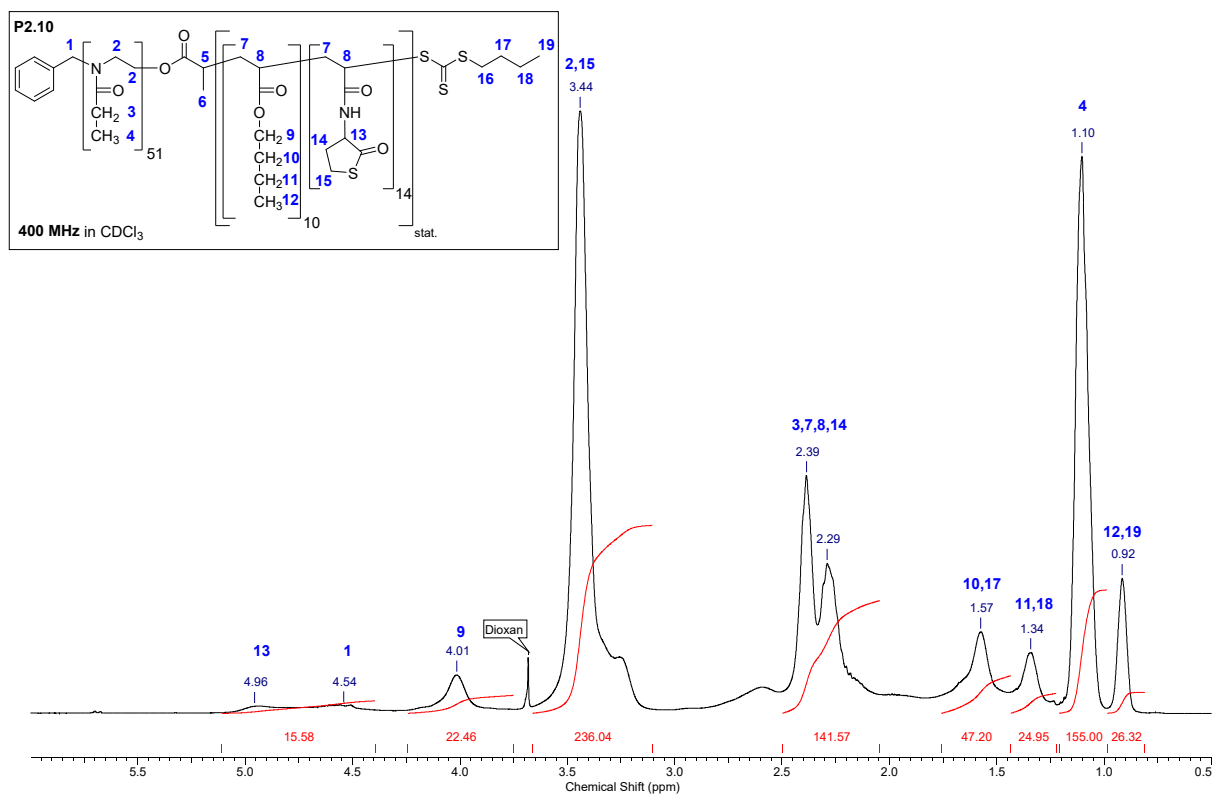

**Figure S21:** <sup>1</sup>H-NMR of P2.10 in CDCl<sub>3</sub>.

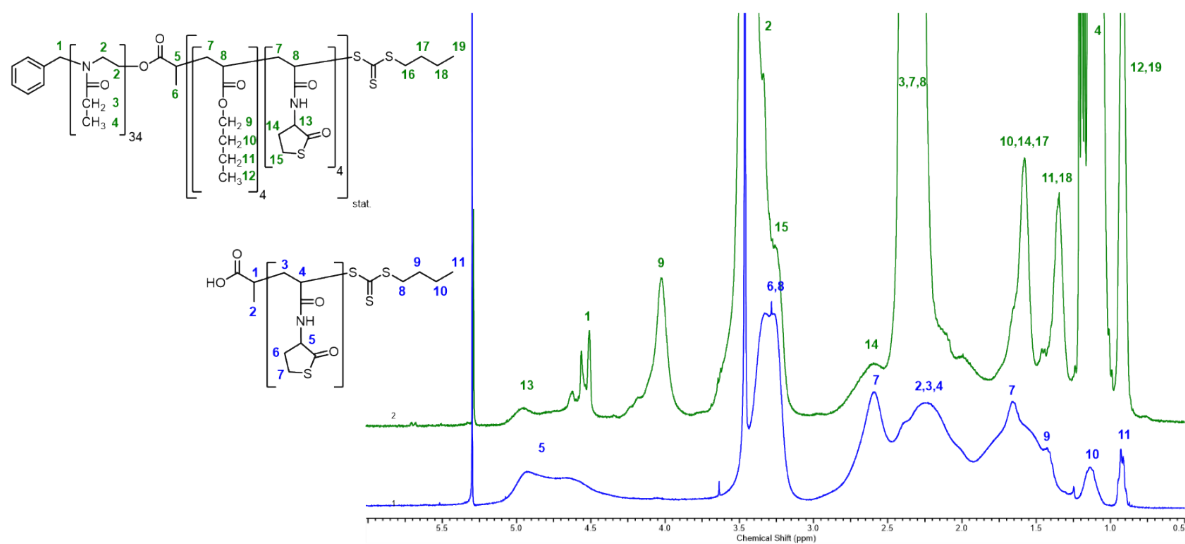

**Figure S22.** <sup>1</sup>H-NMR of the homopolymer poly(thiolactone) and a block copolymer for comparison in CDCl<sub>3</sub>.



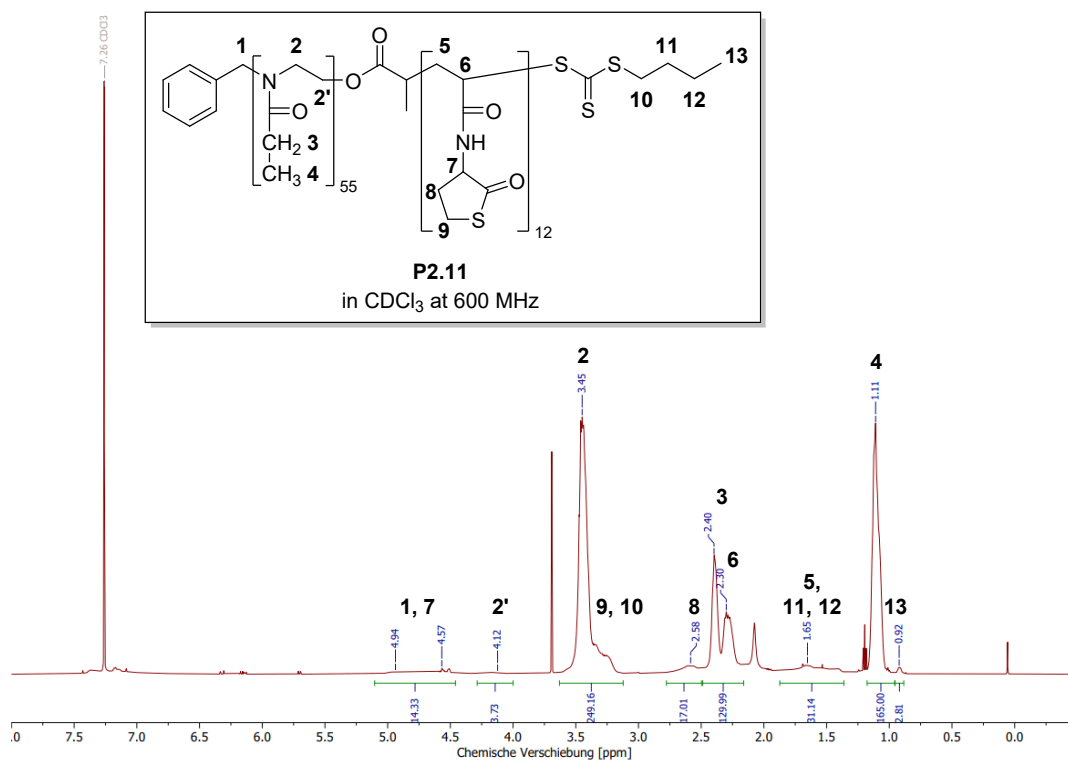

Figure S23. <sup>1</sup>H-NMR of the block copolymer **P2.11** in CDCl<sub>3</sub>.

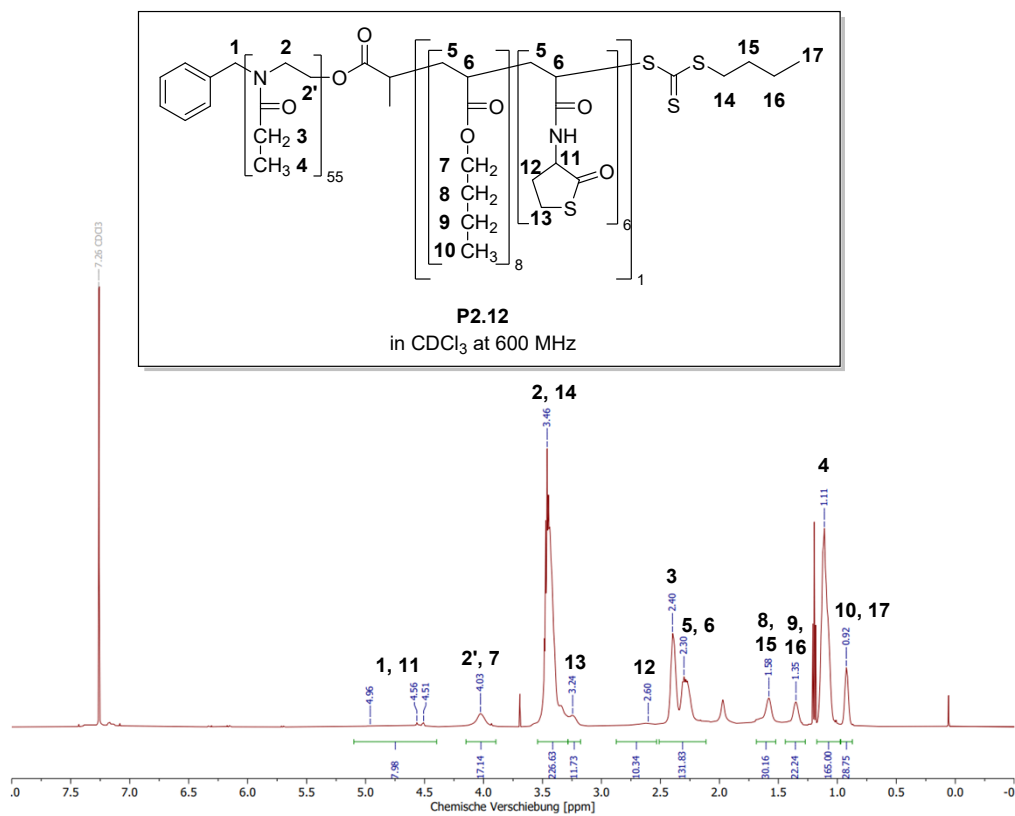

Figure S24. <sup>1</sup>H-NMR of the block copolymer **P2.12** in CDCl<sub>3</sub>.

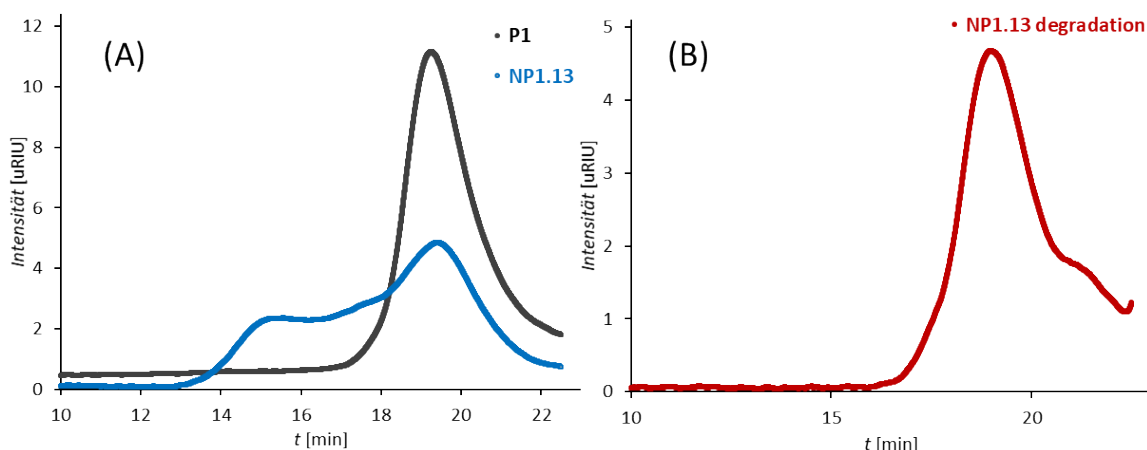

| NP     | eq. cystamine | T [°C] | t [h] | $d_h^a$ (H <sub>2</sub> O) [nm] (PDI) | $d_h^a$ (MeOH) [nm] (PDI) | $M_n^b$ [g/mol] | $\bar{D}^b$ | cross. <sup>b)</sup> [%] | cross. <sup>c)</sup> [%] |
|--------|---------------|--------|-------|---------------------------------------|---------------------------|-----------------|-------------|--------------------------|--------------------------|
| NP1.13 | 0.5(HexA)     | 40     | 20    | 42 ± 14<br>(0.291 ± 0.019)            | 19 ± 3<br>(0.203 ± 0.030) | ---             | ---         | 26                       | 35                       |

**Figure S25.** SEC chromatograms of the nanoparticle NP1.13 from P1 and 1-hexylamine after 24h reaction time at 40 °C (A) and after degradation for 24 h at 36 °C in PBS-buffer with 10 mM DTT (B).

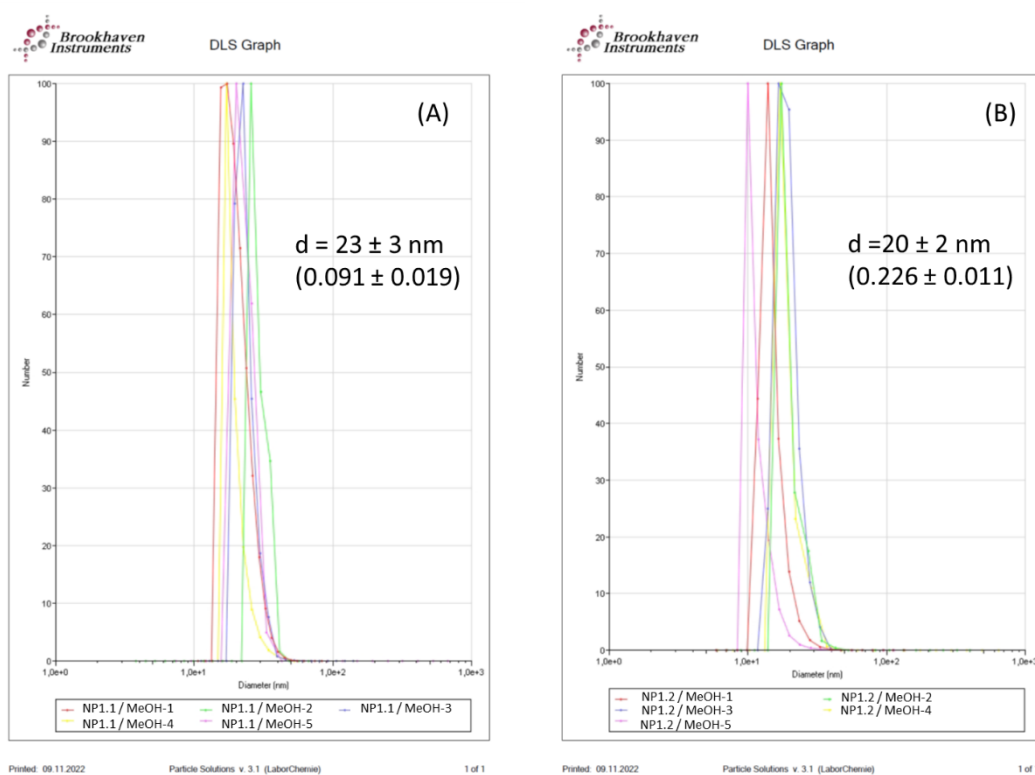

**Figure S26.** DLS data for NP1.1 (A) and NP1.2 (B) from five measurements in MeOH (by number distribution).

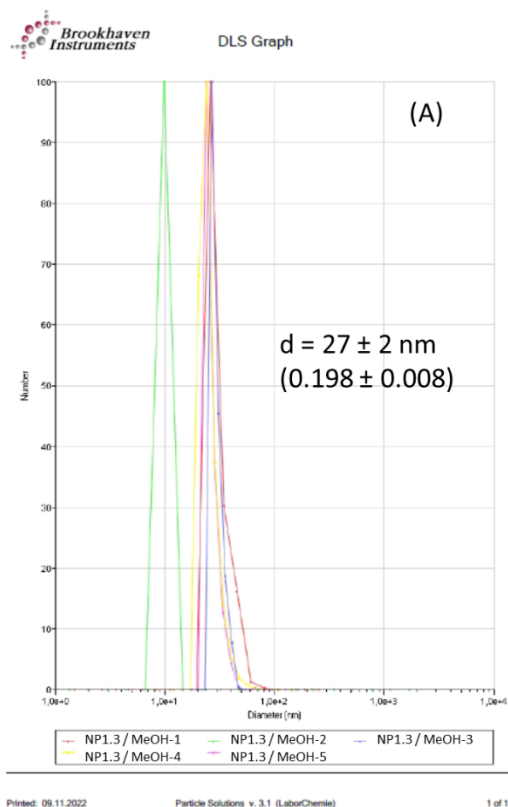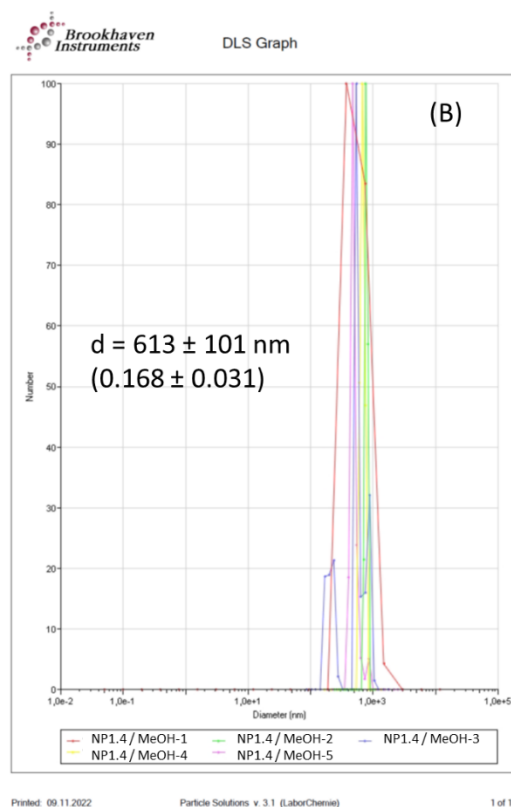

Figure S27. DLS data for NP1.3 (A) and NP1.4 (B) from five measurements in MeOH (by number distribution).

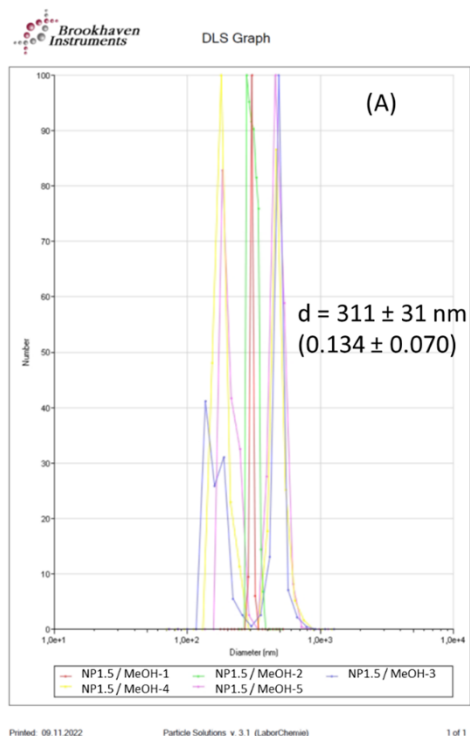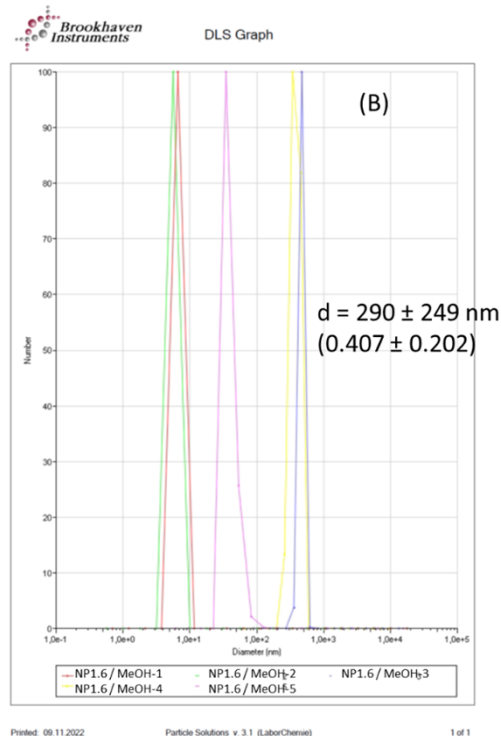

Figure S28. DLS data for NP1.5 (A) and NP1.6 (B) from five measurements in MeOH (by number distribution).

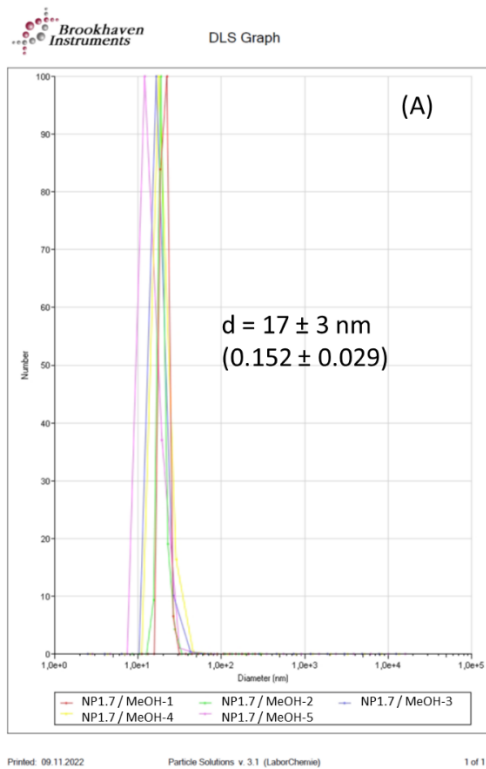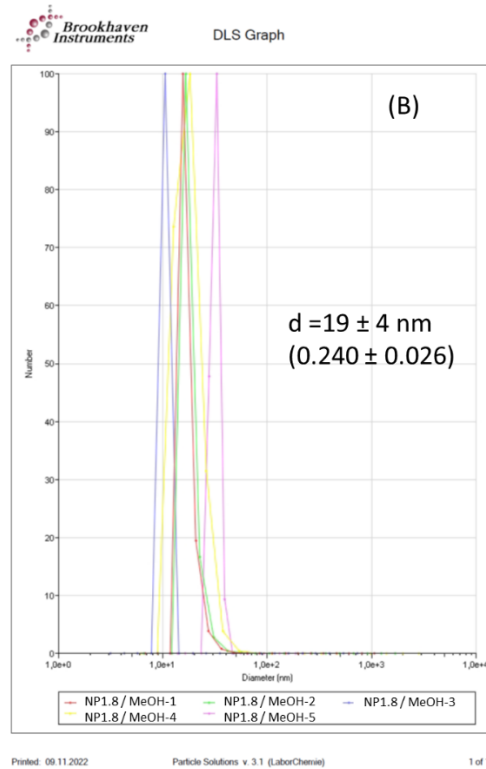

**Figure S29.** DLS data for NP1.7 (A) and NP1.8 (B) from five measurements in MeOH (by number distribution).

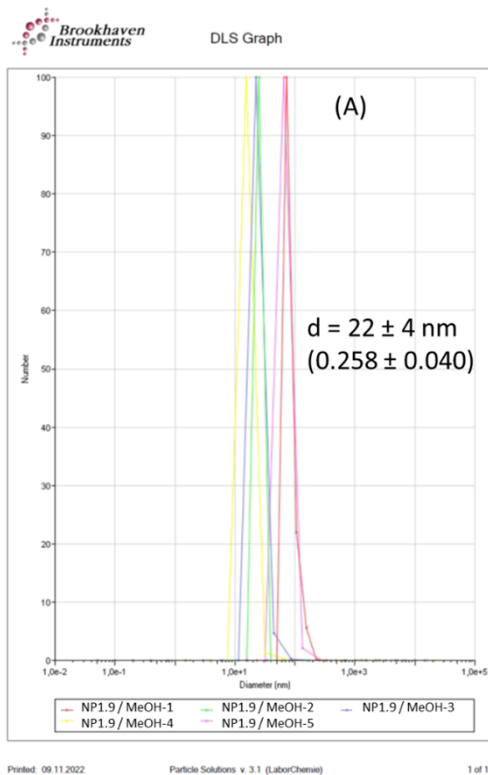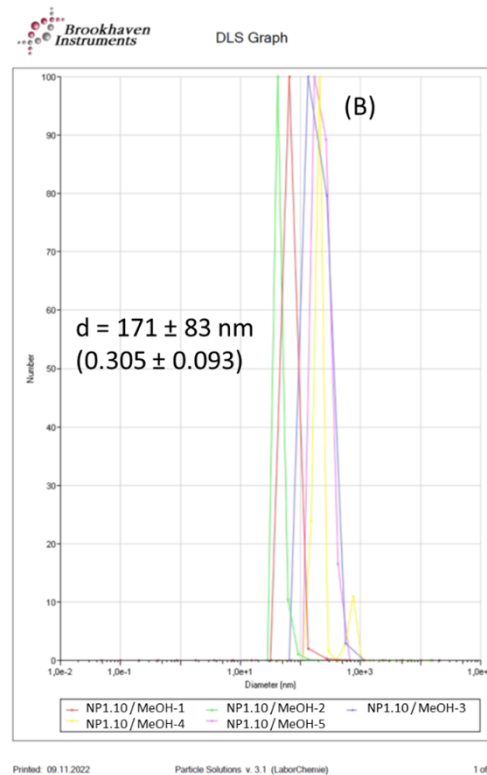

**Figure S30.** DLS data for NP1.9 (A) and NP1.10 (B) from five measurements in MeOH (by number distribution).

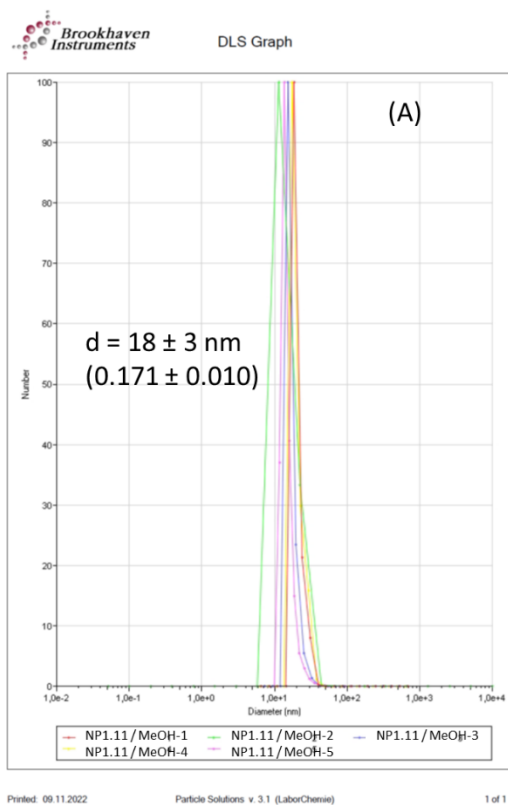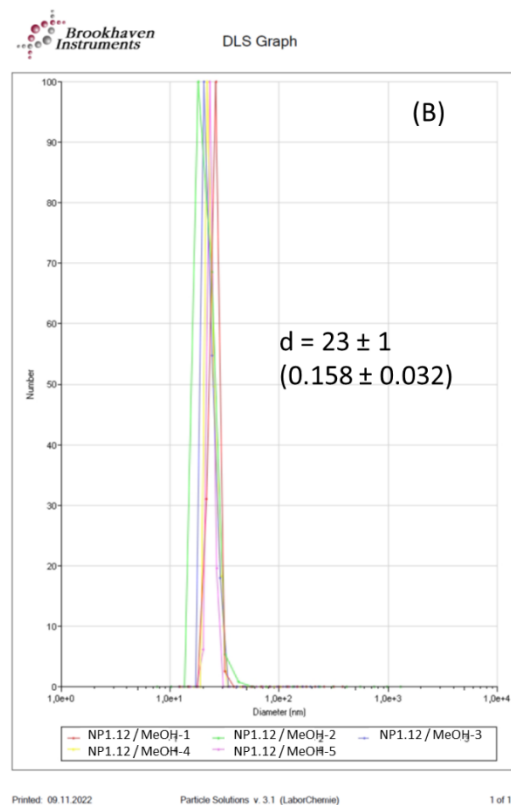

**Figure S31.** DLS data for NP1.11 (A) and NP1.12 (B) from five measurements in MeOH (by number distribution).

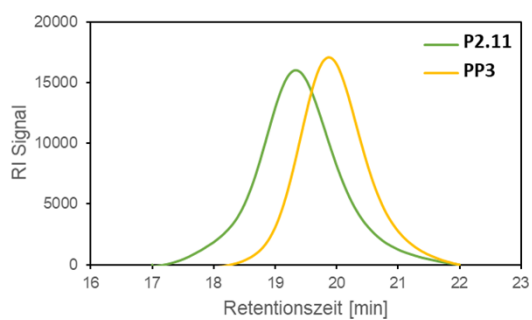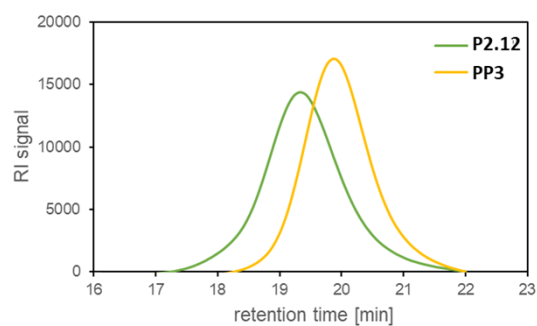

**Figure S32.** SEC chromatograms of the macroRAFT PP3 and the block copolymers P2.11 and P2.12 (Table 1).

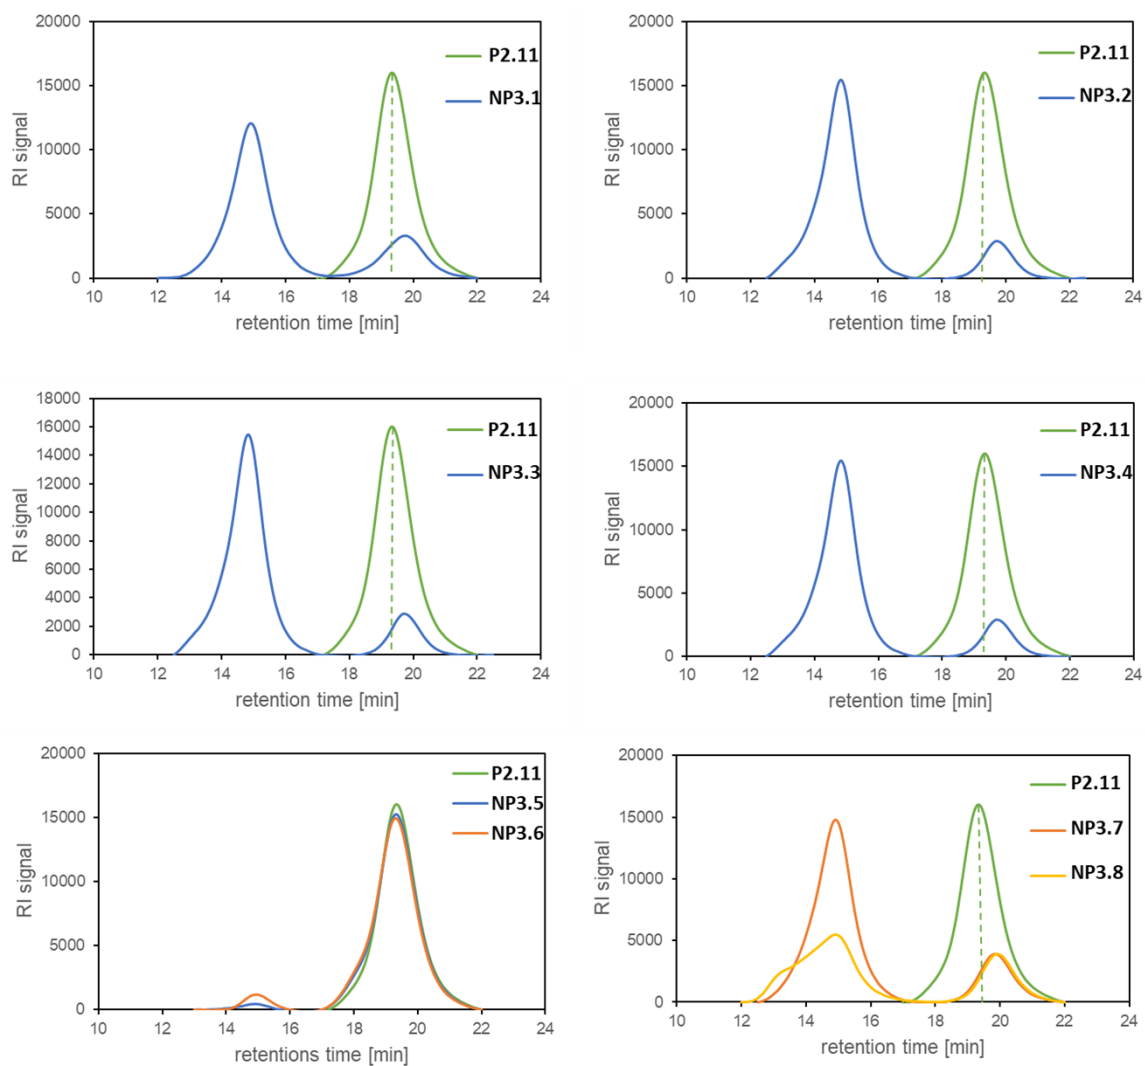

**Figure S33.** SEC chromatograms of the nanoparticle NP3.1 - NP3.8 prepared from P2.11 (Table 2). Polymer solutions of 3 mg/mL were prepared in DMF (with 5 g/L LiBr) and filtered with a syringe filter (0.2  $\mu\text{m}$ ). Measurements were performed at a flow rate of 1 mL/min at 35  $^{\circ}\text{C}$ .

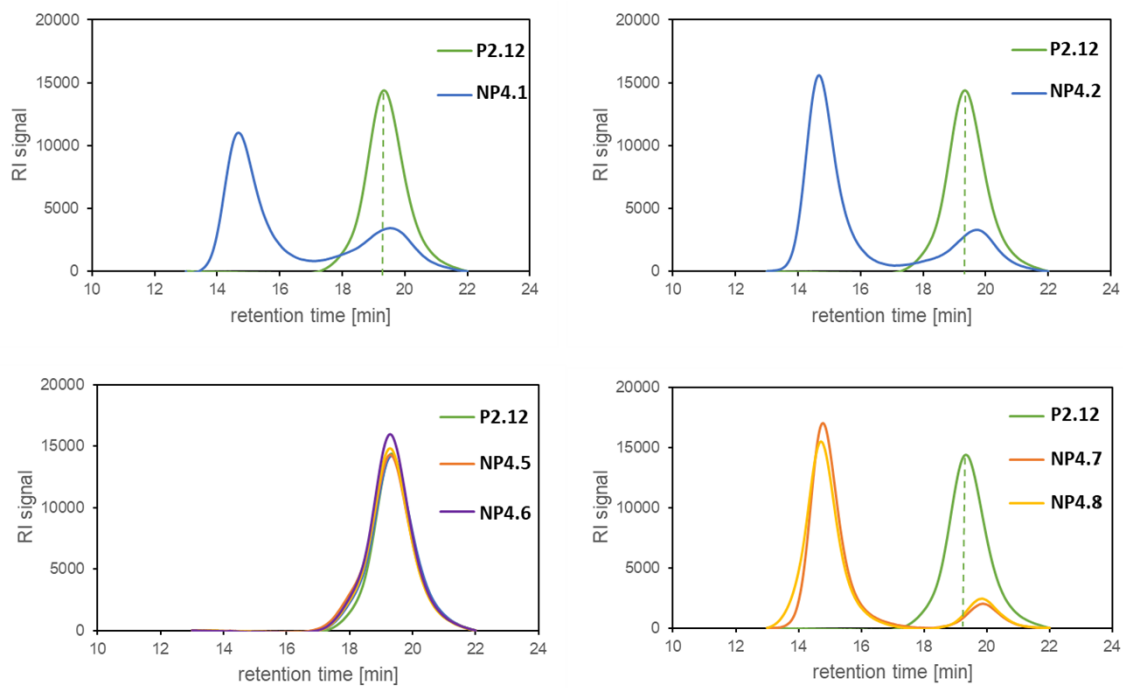

**Figure S34.** SEC chromatograms of the nanoparticle NP4.1, NP4.2 and NP4.5 – NP4.8 prepared from P2.12 (Table 2). Polymer solutions of 3 mg/mL were prepared in DMF (with 5 g/L LiBr) and filtered with a syringe filter (0.2  $\mu\text{m}$ ). Measurements were performed at a flow rate of 1 mL/min at 35  $^{\circ}\text{C}$ .
